# Supplementary material for: Divergent synthesis of oxazolidines and morpholines via PhI(OAc)2-mediated difunctionalization of alkenes
Source: Royal Society of Chemistry journal article supplement (doi:10.1039/d0ob01987a), 2020-01-01

## Supporting Information

### **Divergent Synthesis of Oxazolidines and Morpholines via PhI(OAc)<sub>2</sub>-Mediated Difunctionalization of Alkenes**

Shuang Yang, Yuhang Chen, Zidan Yuan, Feiyu Bu, Zhenhua Ding, Cheng Jiang\*

Jiangsu Key Laboratory of Drug Design and Optimization, Department of Medicinal Chemistry,  
School of Pharmacy, China Pharmaceutical University, Nanjing 211198, China.

### Contents

|                                                                                       |   |
|---------------------------------------------------------------------------------------|---|
| General information .....                                                             | 2 |
| Procedure for difunctionalization of alkenes with <i>N</i> -tosyl amino alcohols..... | 3 |
| Procedure for gram scale reaction.....                                                | 3 |
| Procedure for deuterium-labeling experiment.....                                      | 4 |
| LC-MS Spectra of reaction mixture .....                                               | 5 |
| Reference .....                                                                       | 6 |
| NMR spectra of products .....                                                         | 7 |

## General information

Unless otherwise noted, all commercially available reagents and solvents were used without further purification. All reactions were performed by standard Schlenk techniques in oven-dried reaction vessels under air. Column chromatography was generally performed on silica gel (200-300 mesh) and reactions were monitored by thin layer chromatography (TLC) using silica gel GF254 plates with UV light to visualize the course of reaction. Melting points were determined on a ShenGuang WRS-2 melting point apparatus.  $^1\text{H}$  NMR,  $^{13}\text{C}$  NMR,  $^1\text{H}$ - $^1\text{H}$  NOE were recorded in  $\text{CDCl}_3$  (internal standard: 7.26 ppm,  $^1\text{H}$ ; 77.0 ppm,  $^{13}\text{C}$ ) using Bruker AV-300 (300 MHz) or AV-400 (400 MHz) NMR spectrometers.  $^2\text{H}$  NMR were recorded in  $\text{CHCl}_3$  using Bruker AV-300 (300 MHz) spectrometers. The chemical shifts ( $\delta$ ) are reported in ppm and coupling constants ( $J$ ) in Hz. The mass data (LC-MS) and high resolution mass data (HRMS) were obtained using ESI technique. The *N*-tosyl amino alcohols<sup>1</sup> and  $\beta$ -substituted styrenes<sup>2</sup> were synthesized according to the reported procedure.

## Procedure for difunctionalization of alkenes with *N*-tosyl amino alcohols

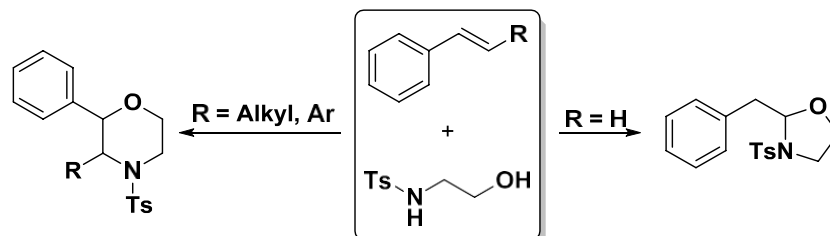

The *N*-tosyl aminoethanol (43.05 mg, 0.2 mmol) and styrene (31.25 mg, 0.3 mmol),  $\text{PhI}(\text{OAc})_2$  (96.63 mg, 0.3 mmol),  $\text{Zn}(\text{BF}_4)_2 \cdot x\text{H}_2\text{O}$  (4.78 mg, 0.02 mmol) were dissolved in toluene (1 mL) in an oven-dried Schlenk tube. This reaction mixture was stirred at room temperature. After completion of the reaction, the resulting mixture was concentrated and purified by column chromatography (hexane: ethylacetate = 10:1) to give the product **3aa** in 81% yield. Other oxazolidinone derivatives **3ba-3pa**, **3ab-3aj** were obtained by the same procedure. The morpholine derivatives **5aa-5oa**, **5ai** were afforded in toluene (0.3 M) by the same procedure. Besides, **5ae-5ah** were afforded in DCM (0.3 M) by the same procedure.

## Procedure for gram scale reaction

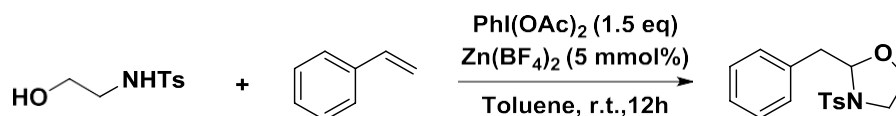

The *N*-tosyl aminoethanol (0.86 g, 4 mmol) and  $\text{PhI}(\text{OAc})_2$  (1.93 g, 6 mmol),  $\text{Zn}(\text{BF}_4)_2 \cdot x\text{H}_2\text{O}$  (47.8 mg, 0.2 mmol) followed by styrene (0.63 g, 6 mmol) were dissolved in toluene (20 mL) in a 100 mL flask. This reaction mixture was stirred at room temperature. After completion of the reaction, the resulting mixture was concentrated and purified by column chromatography to give the product **3aa** in 87% yield.

## Procedure for deuterium-labeling experiment

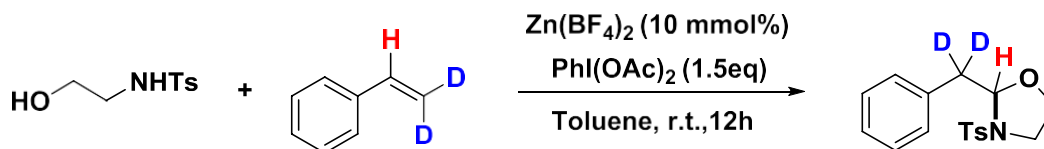

The *N*-tosyl aminoethanol (43.05 mg, 0.2 mmol) and styrene-β, β-d<sub>2</sub> (31.85 mg, 0.3 mmol), PhI(OAc)<sub>2</sub> (96.63 mg, 0.3 mmol), Zn(BF<sub>4</sub>)<sub>2</sub>·xH<sub>2</sub>O (4.78 mg, 0.02 mmol) were dissolved in toluene (1 mL) in an oven-dried Schlenk tube. This reaction mixture was stirred at room temperature. After completion of the reaction, the resulting mixture was concentrated and purified by column chromatography to give the product [D<sub>2</sub>]-**3aa** (48 mg, 75% yield).

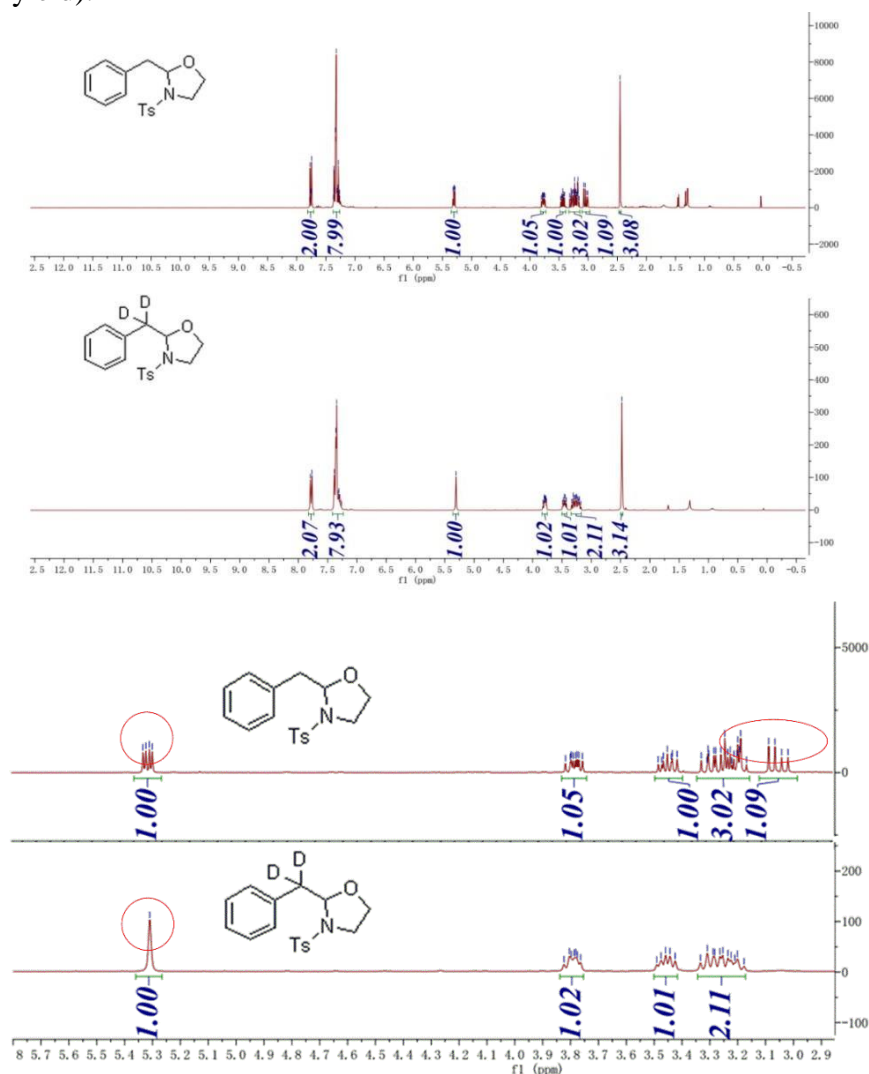

Figure S1. Comparison of <sup>1</sup>H NMR of **3aa** and **3aa-d<sub>2</sub>**.

## LC-MS Spectra of reaction mixture

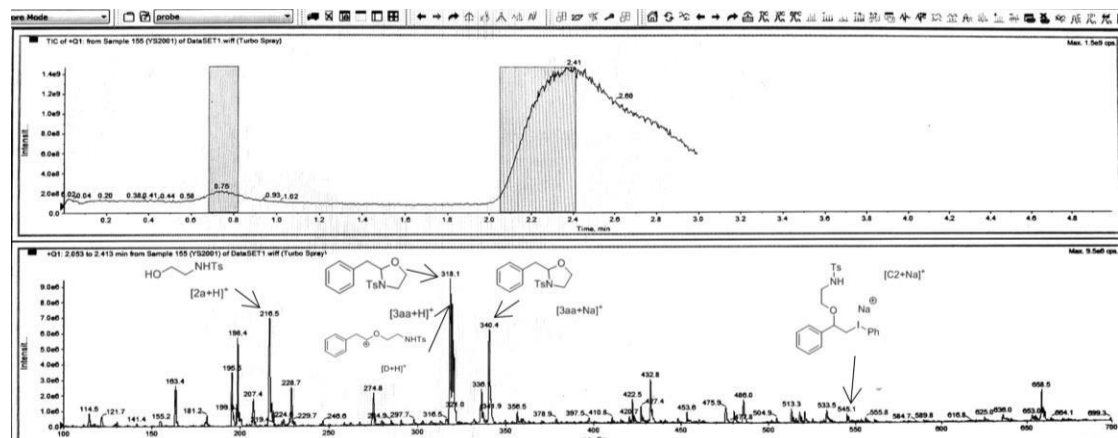

**Figure S2.** LC-MS of the reaction of **1a** with **2a**. Conditions: **1a** (0.3 mmol), **2a** (0.2 mmol),  $\text{PhI}(\text{OAc})_2$  (0.3 mmol),  $\text{Zn}(\text{BF}_4)_2$  (0.02 mmol), room temperature, 60 min.

## Reference

1. X. Dong, Y. Han, F. Yan, Q. Liu, P. Wang, K. Chen, Y. Li, Z. Zhao, Y. Dong and H. Liu, *Org. Lett.*, 2016, **18**, 3774.
2. L. Zheng, F. Gao, C. Yang, G.-L. Gao, Y. Zhao, Y. Gao and W. Xia, *Org. Lett.*, 2017, **19**, 5086.



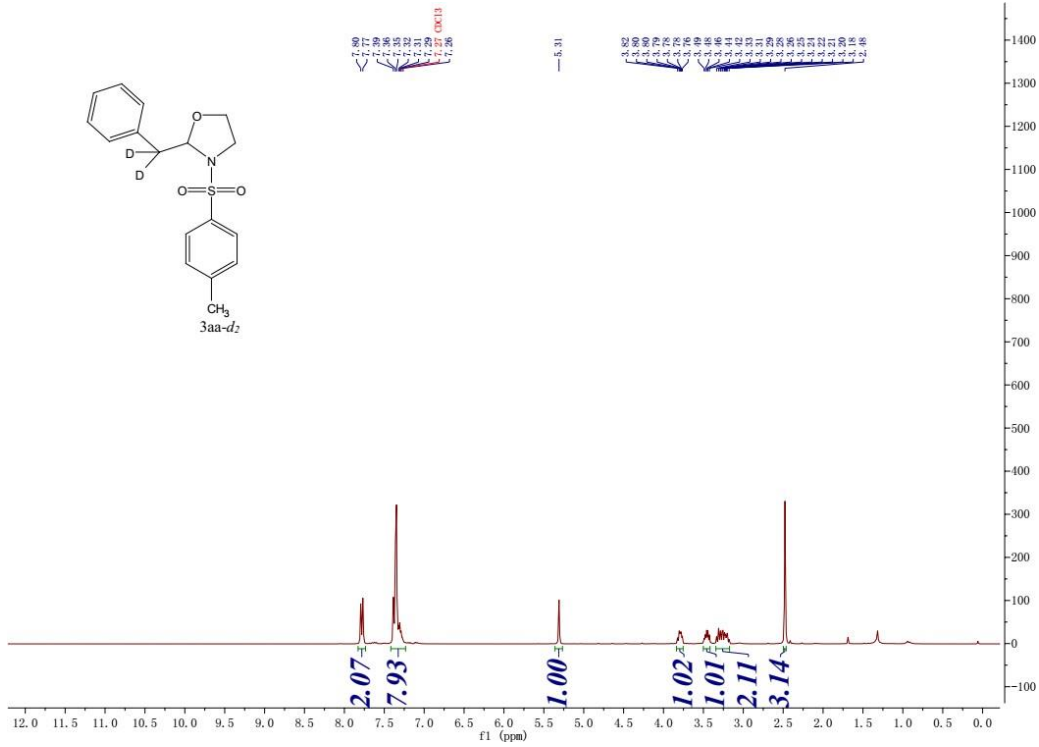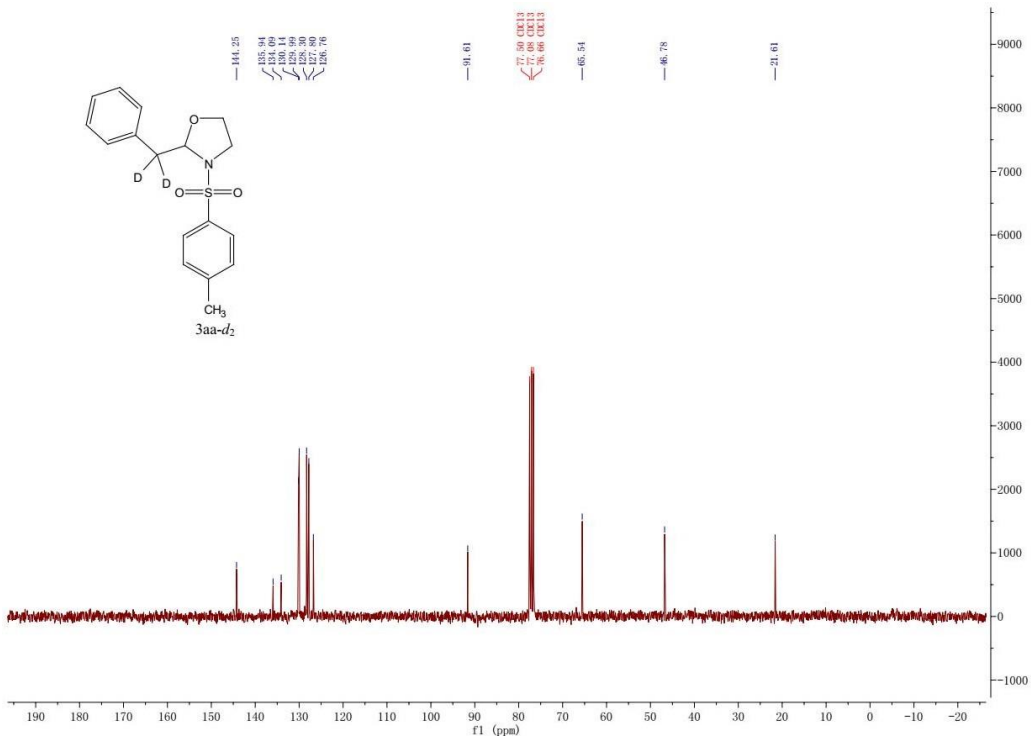



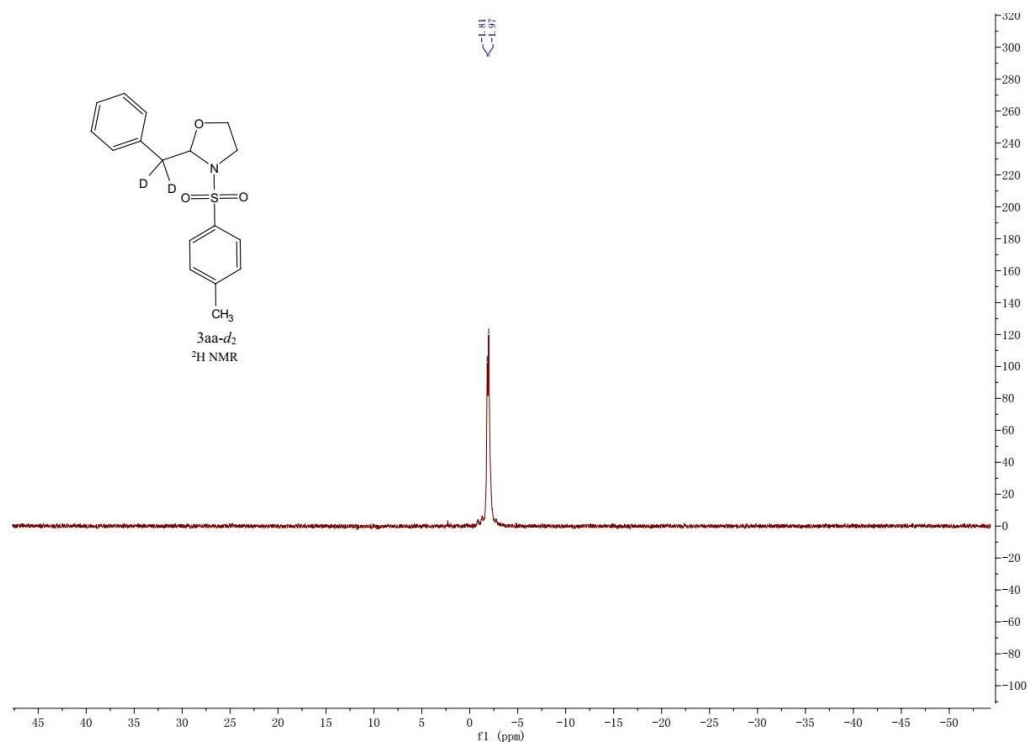

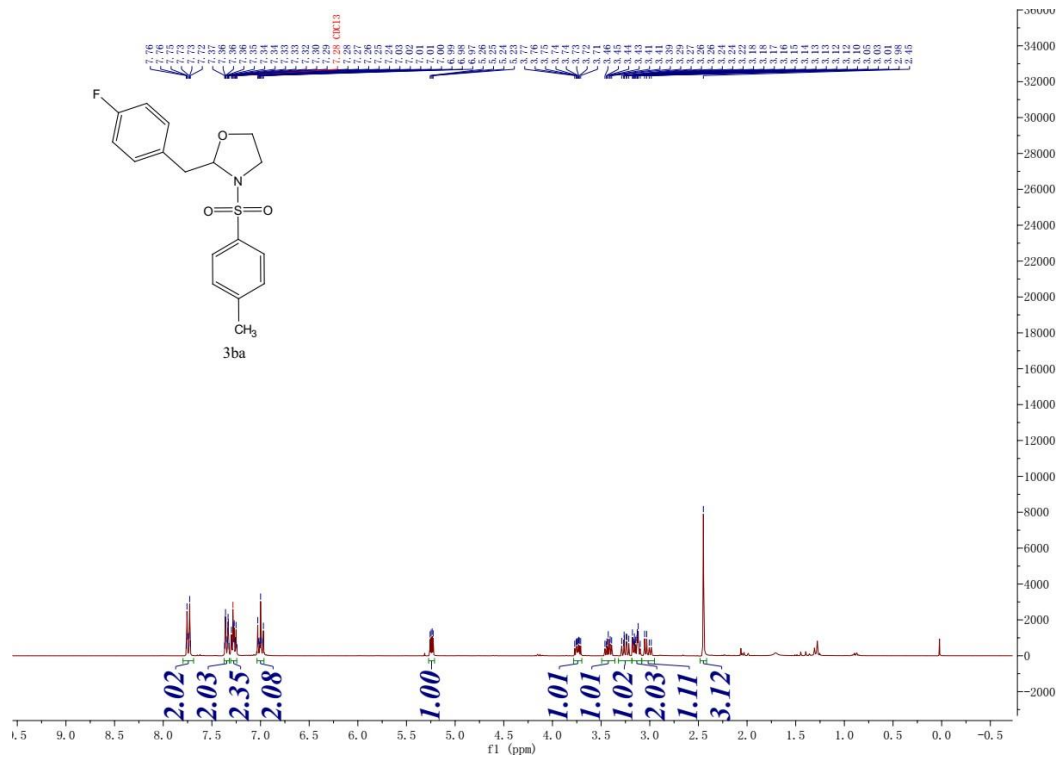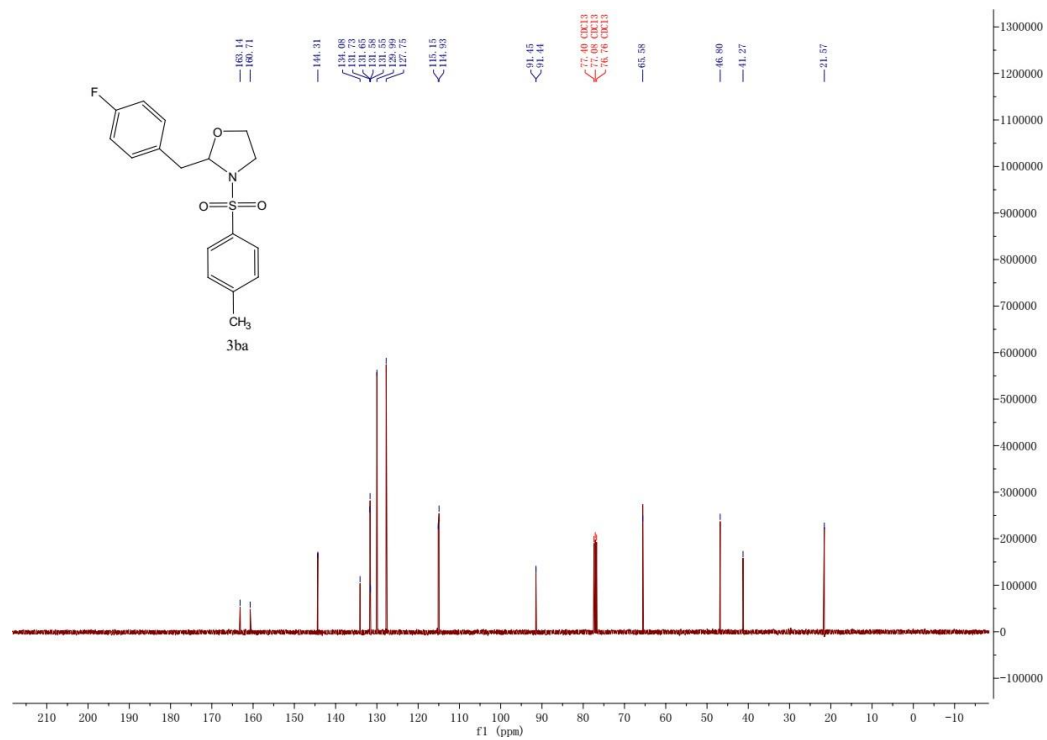



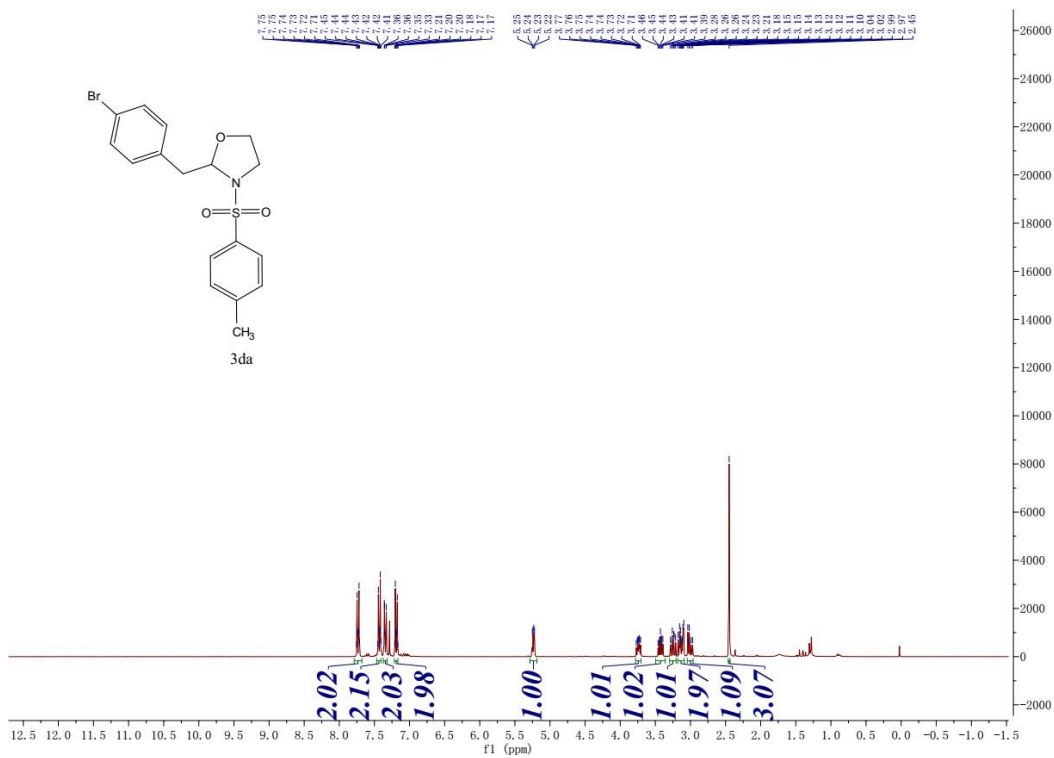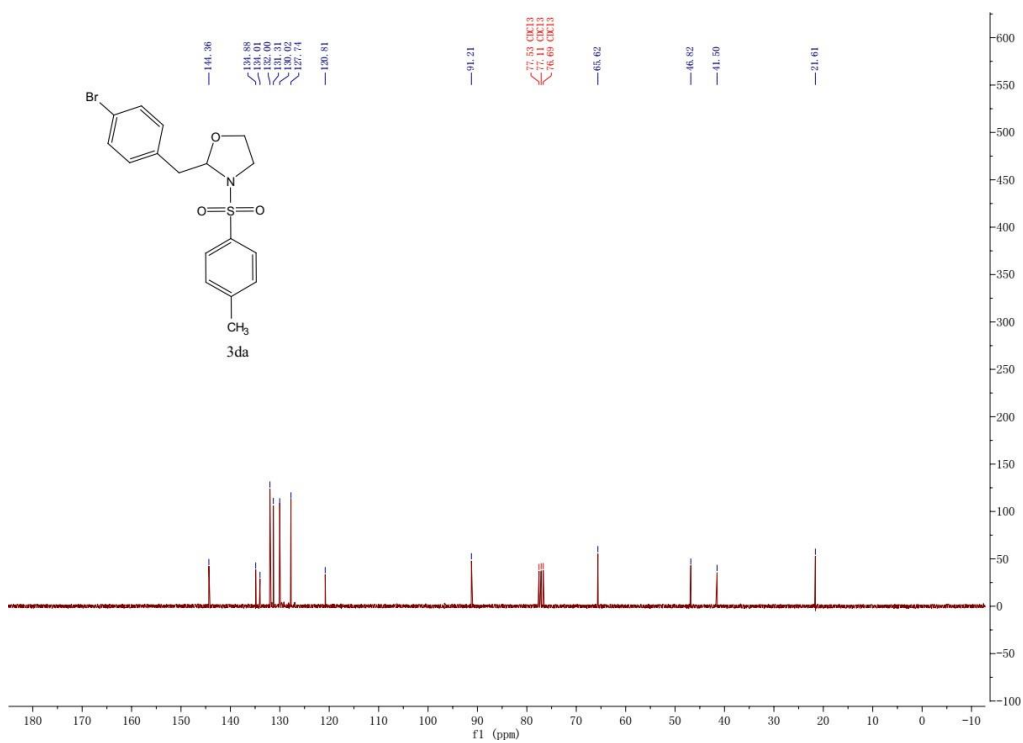



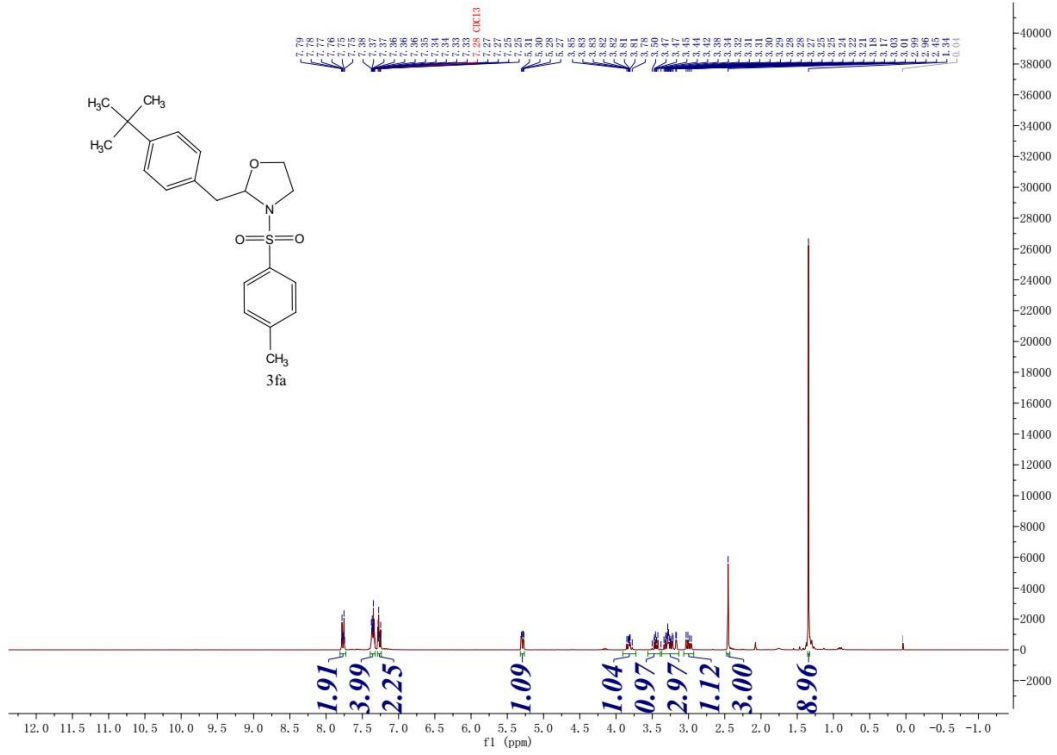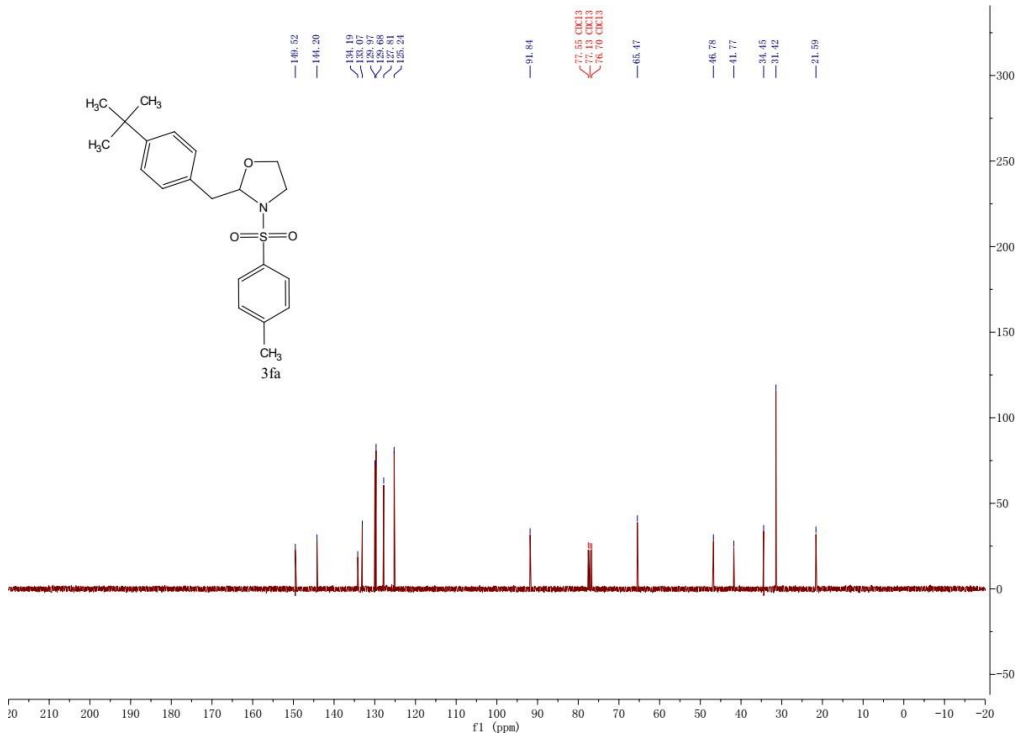

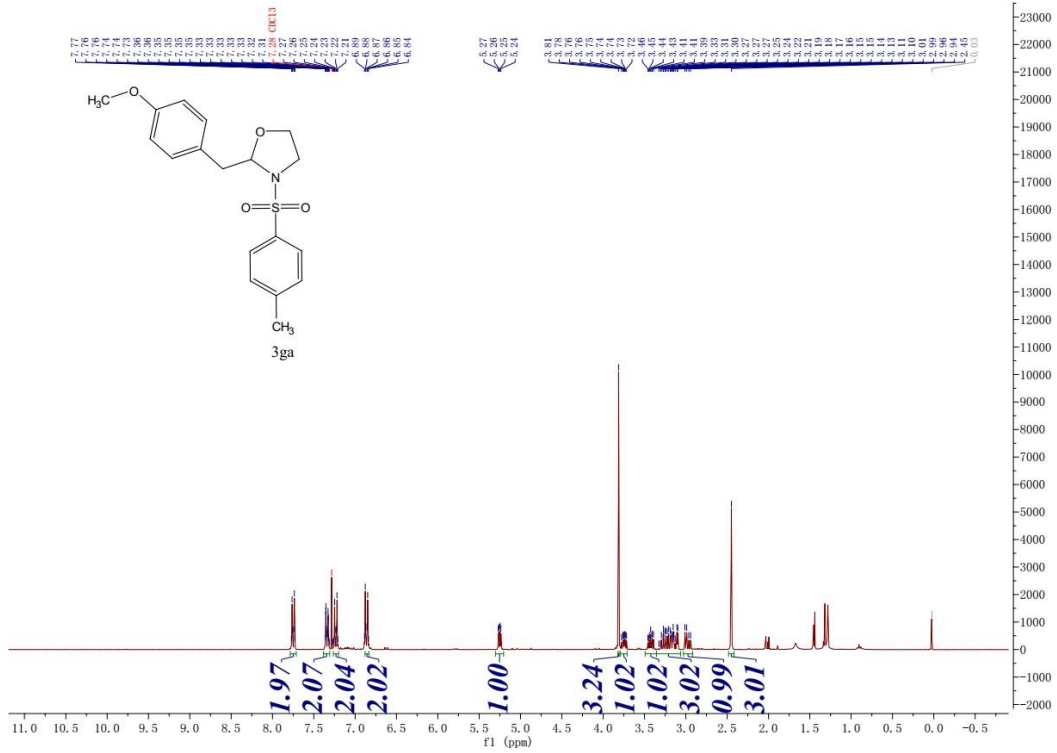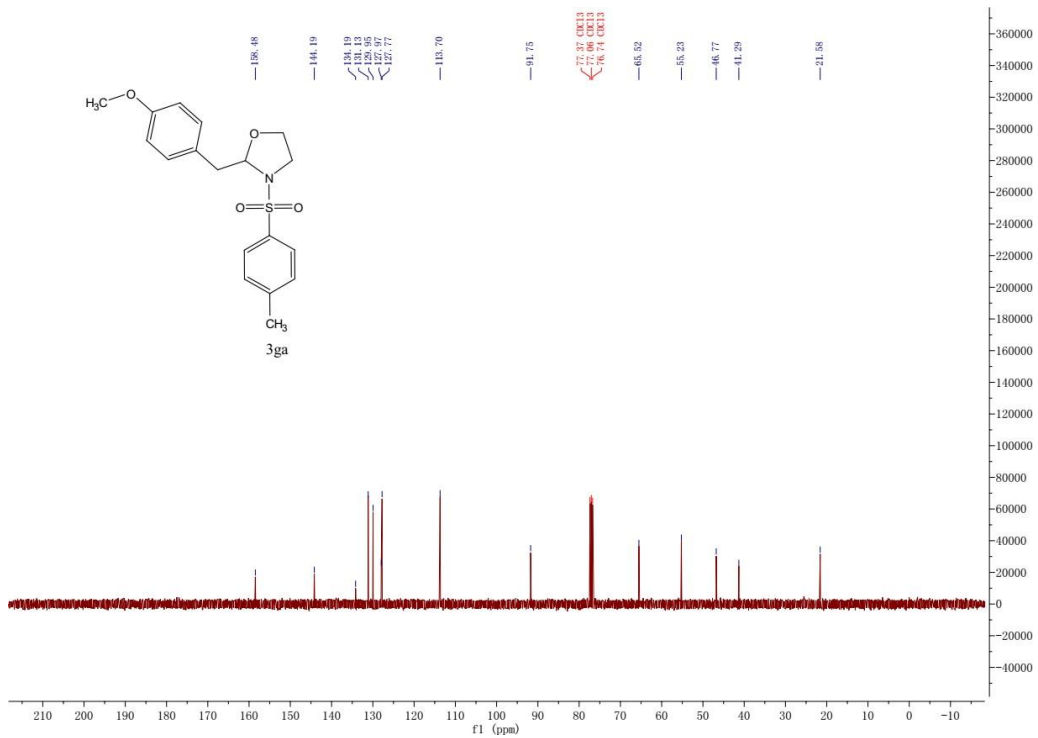

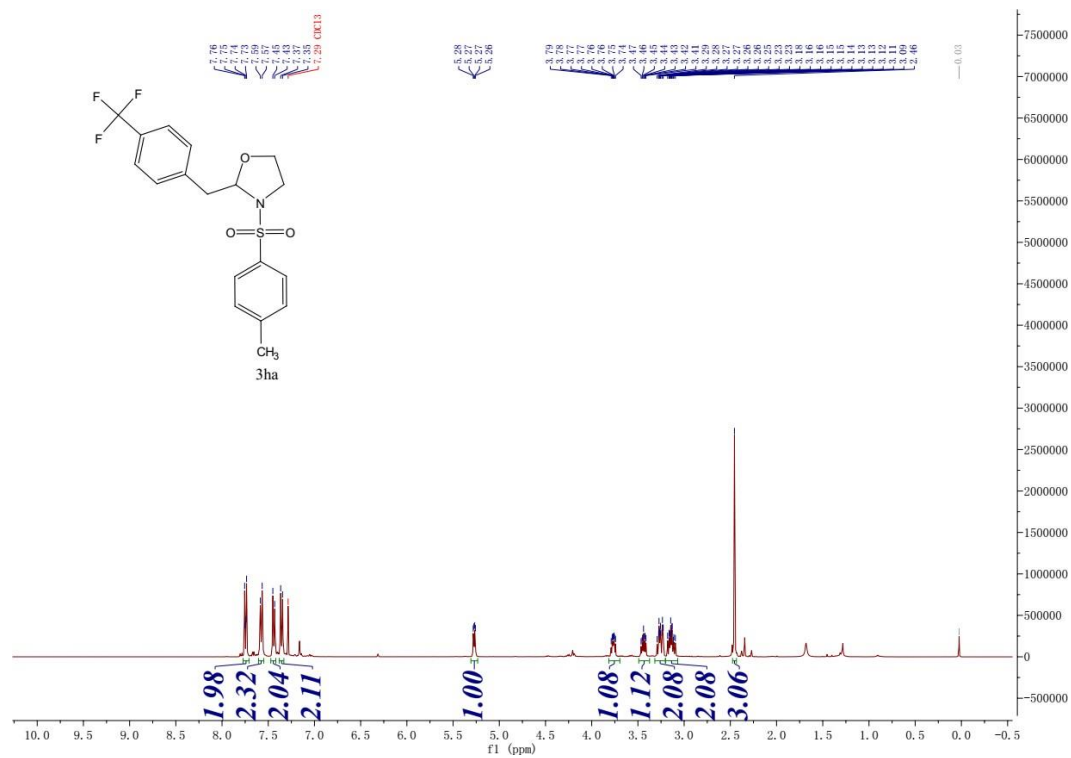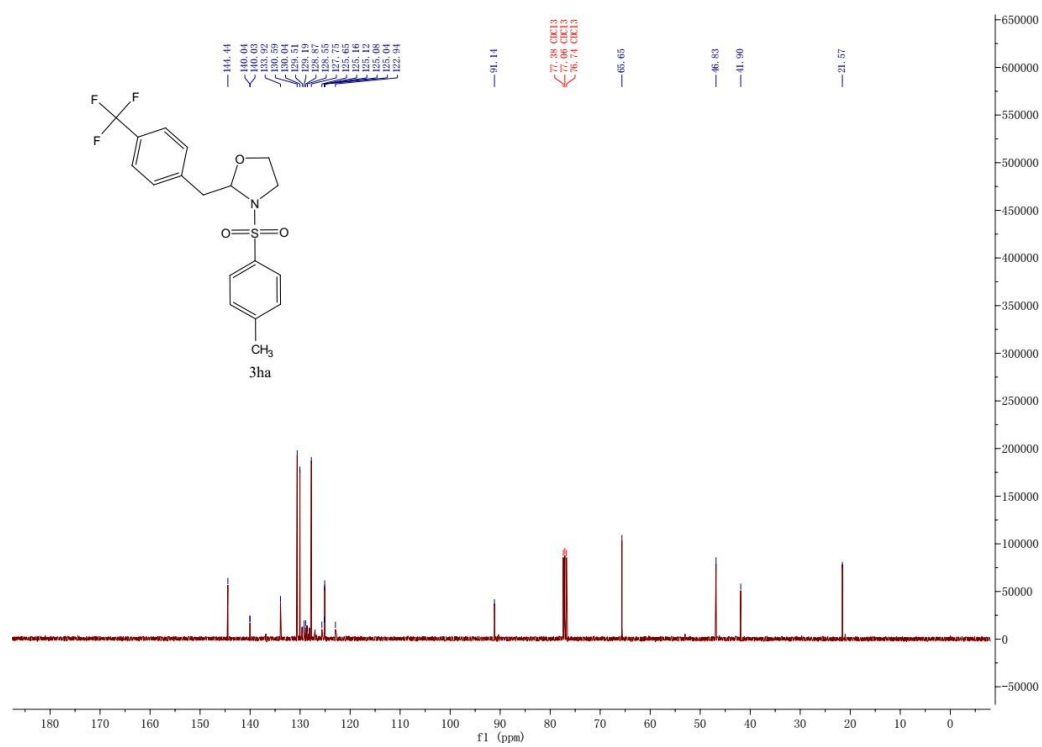





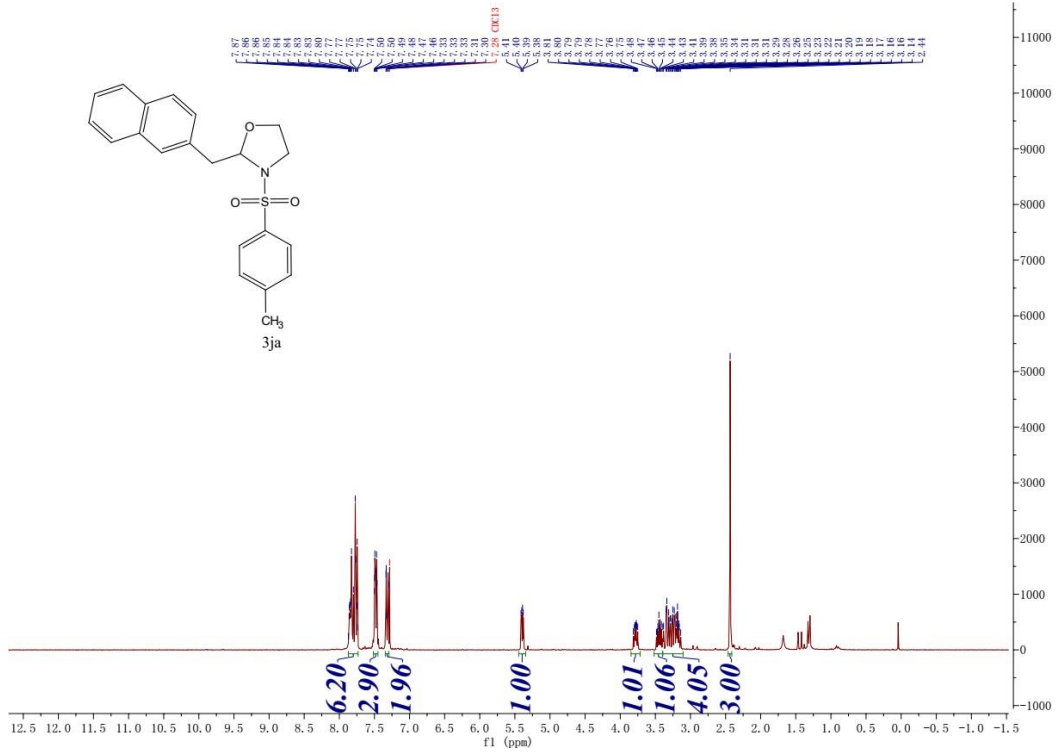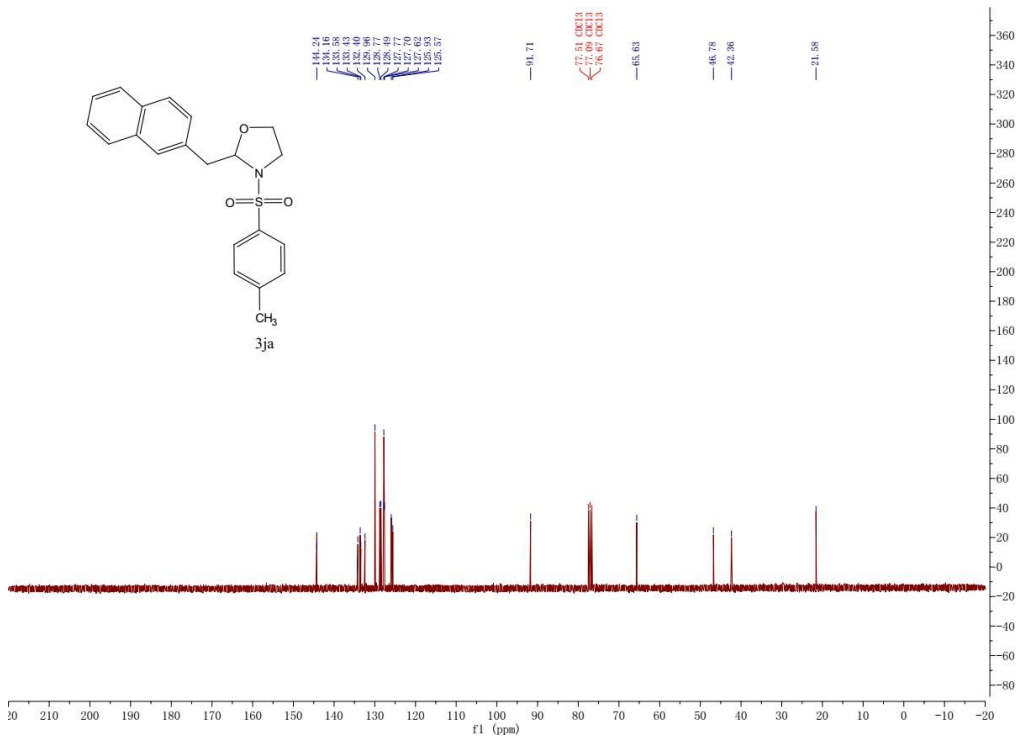



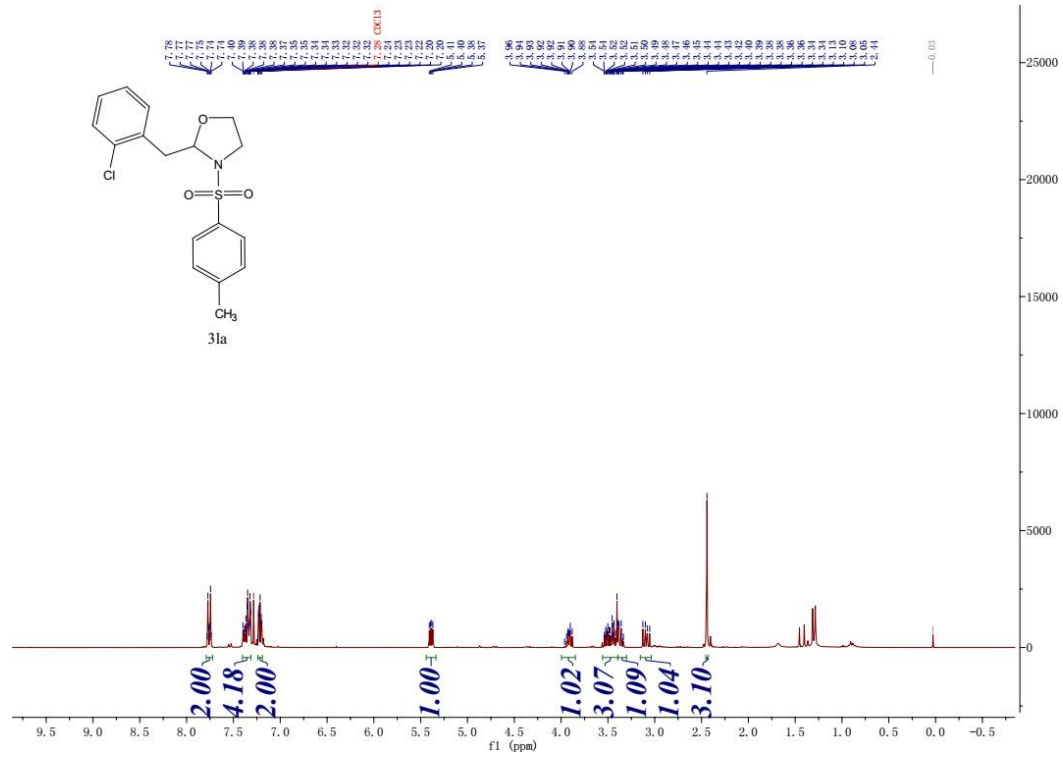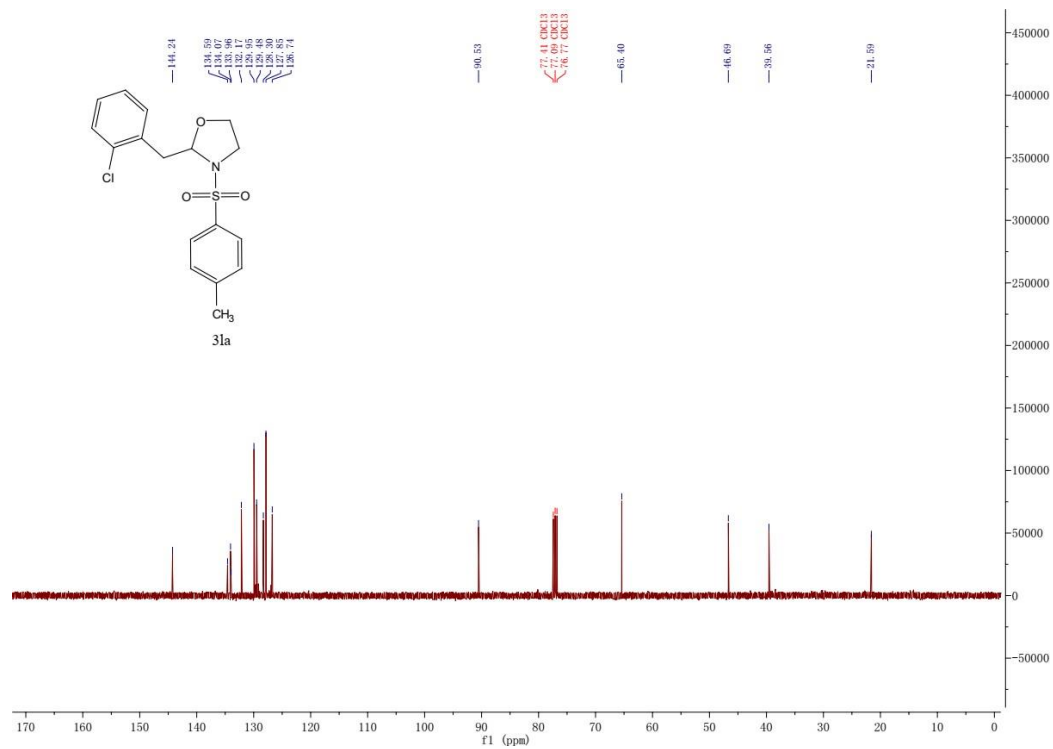

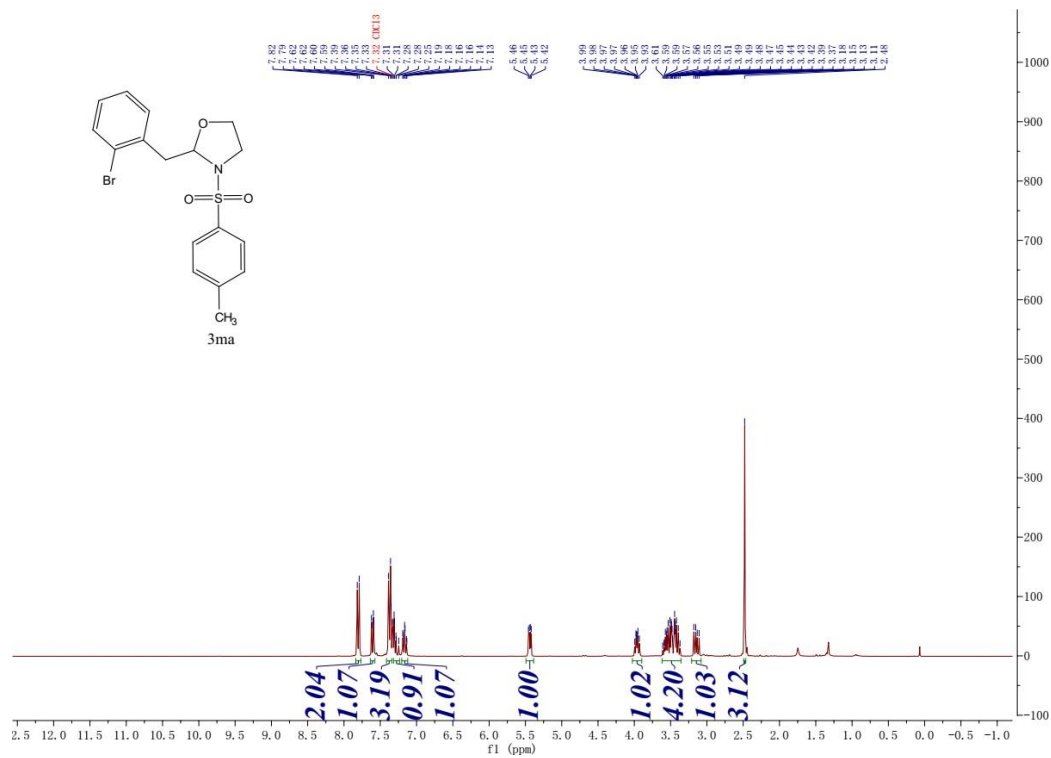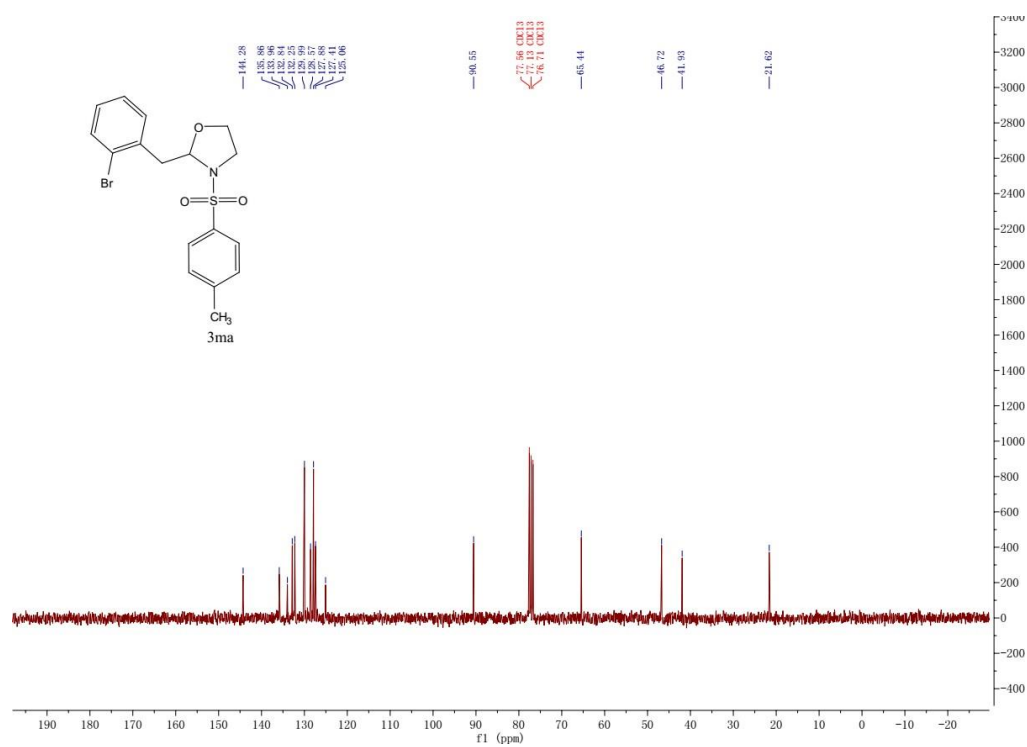

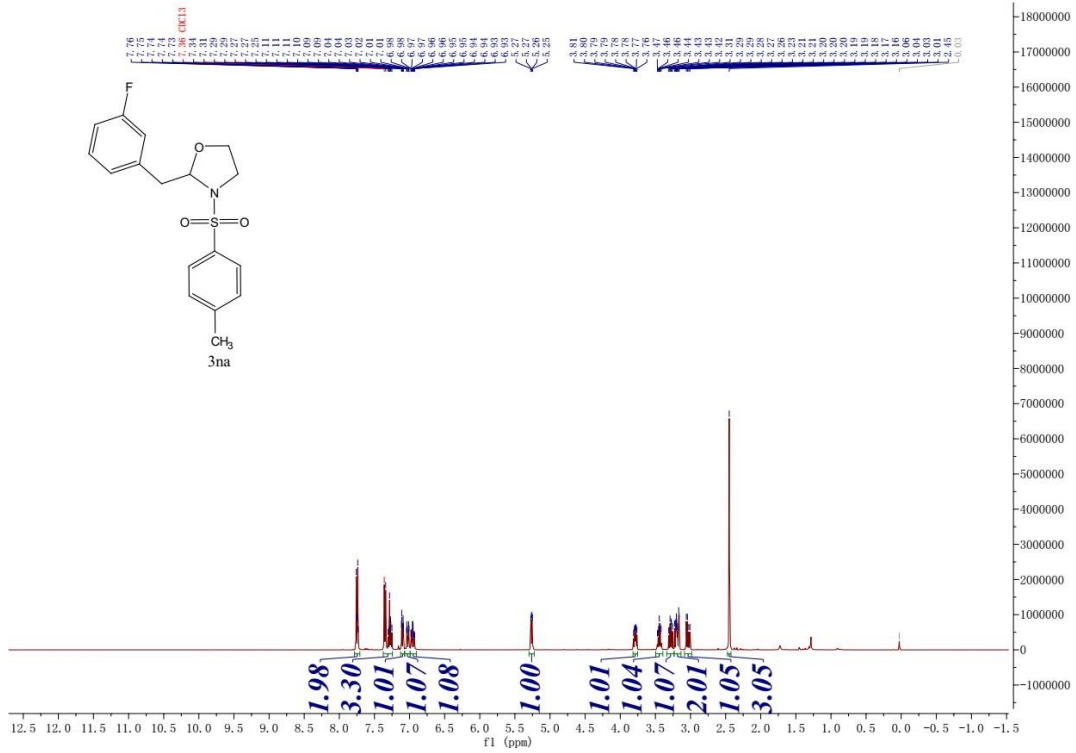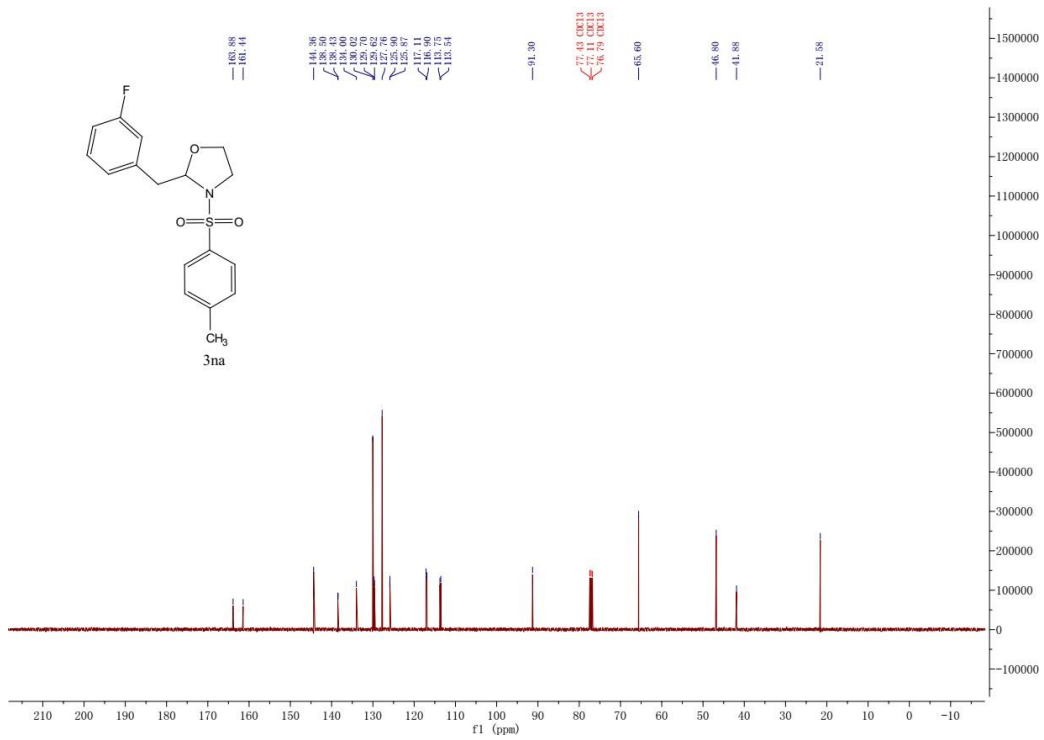

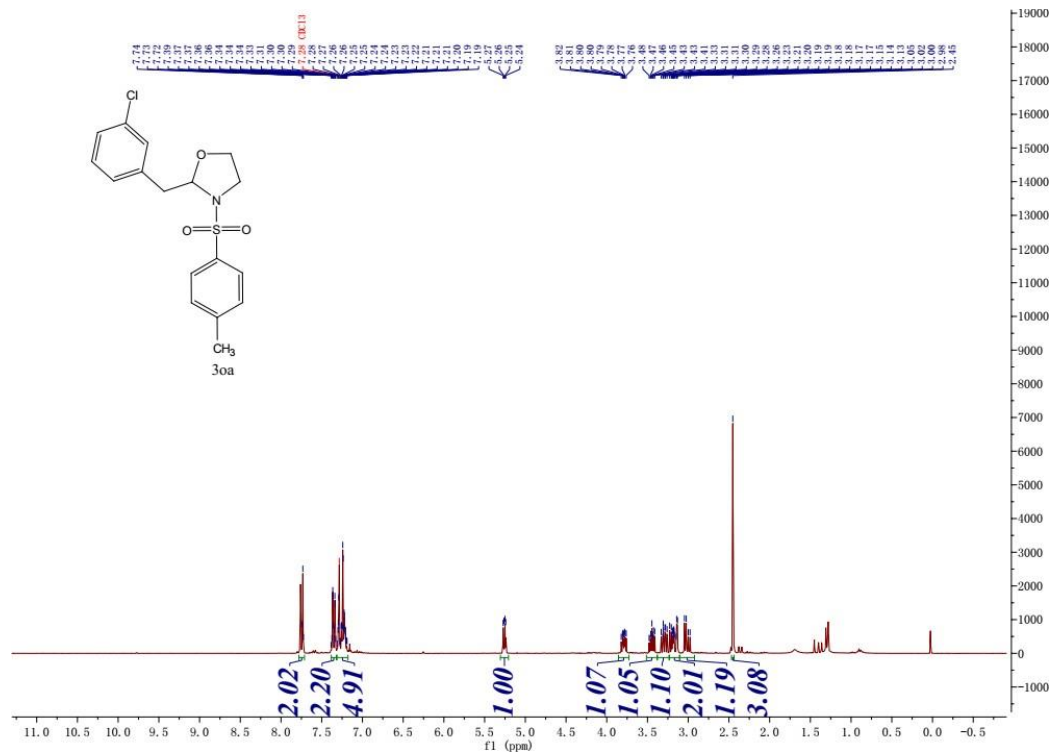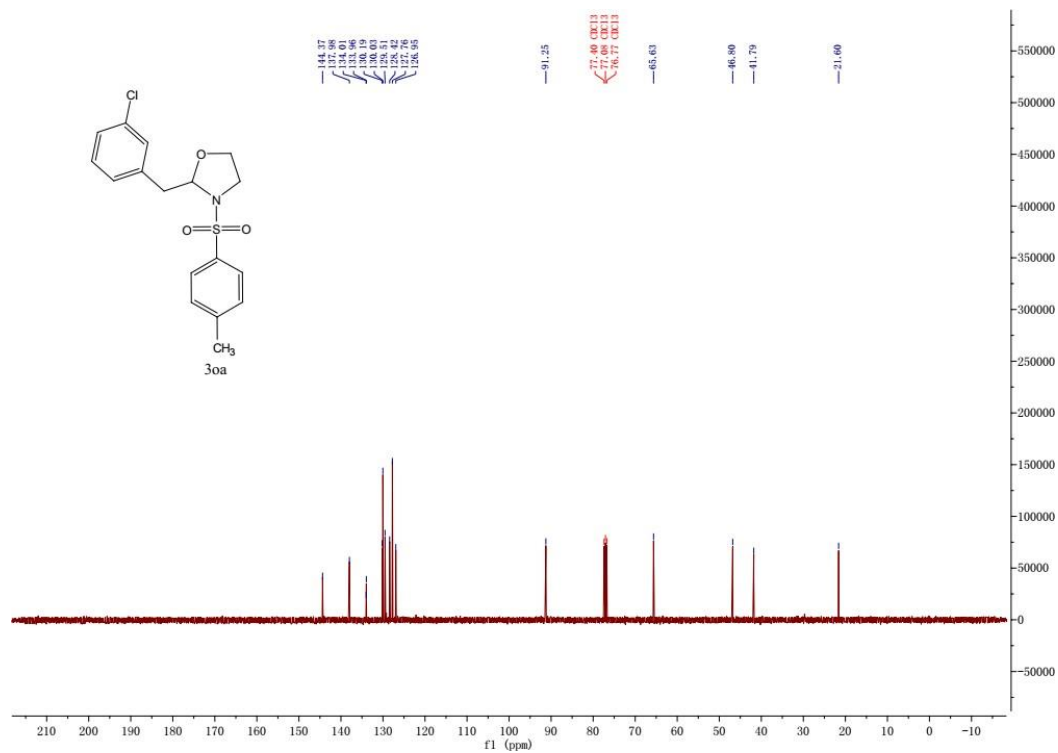





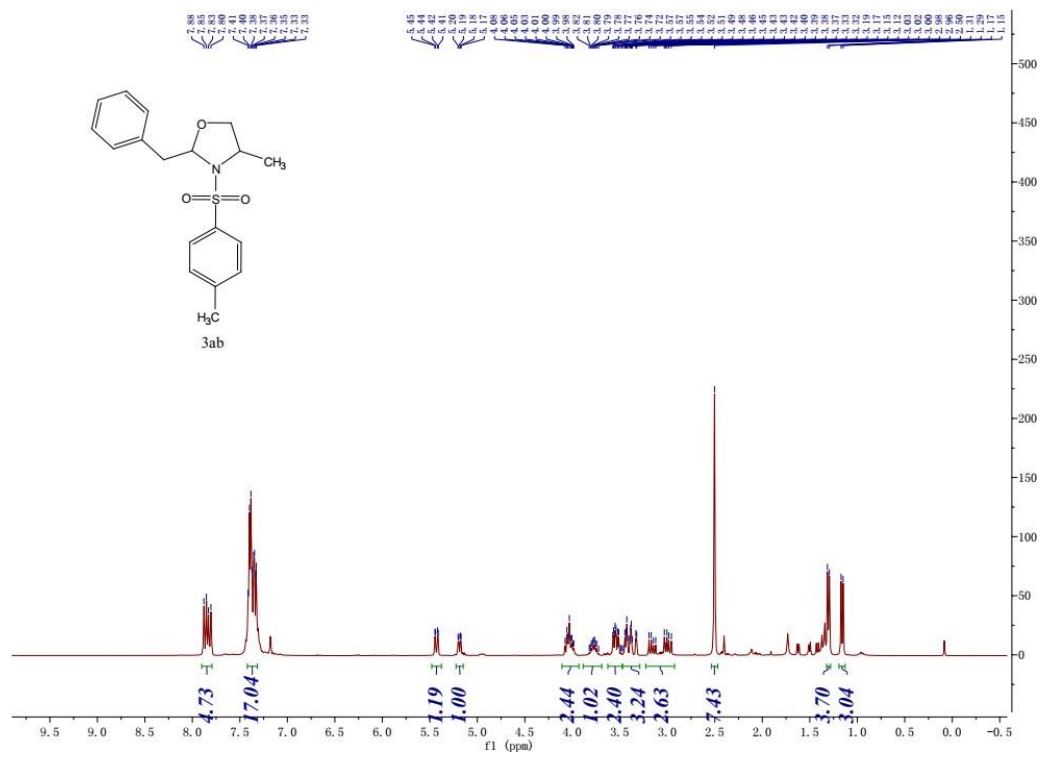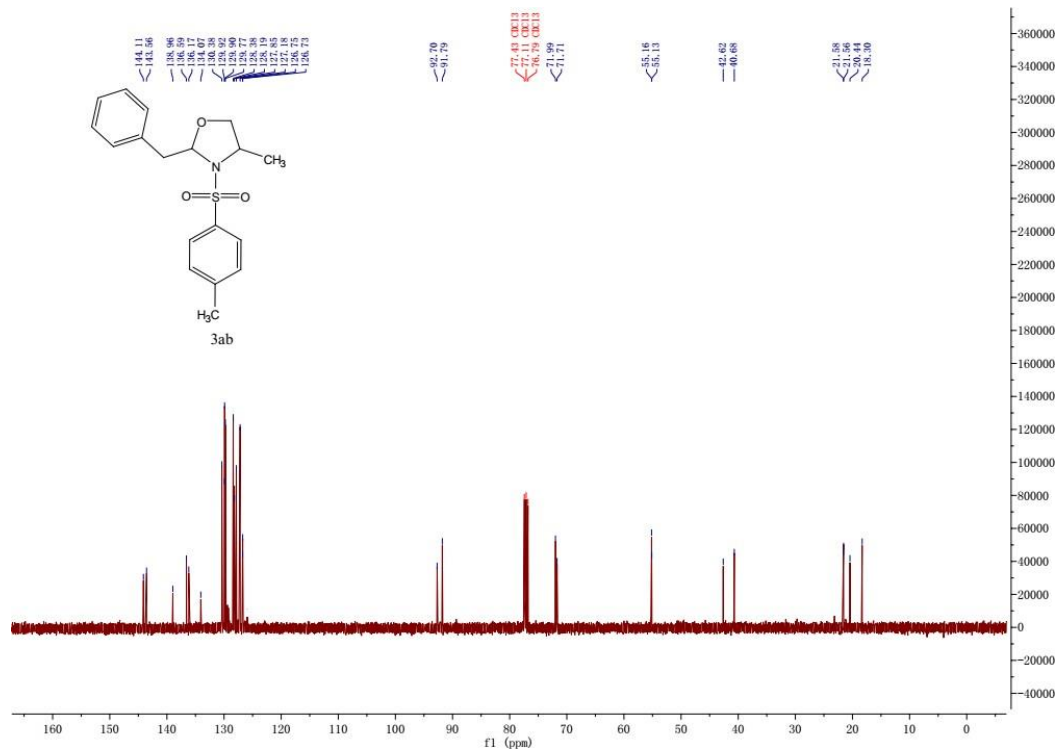

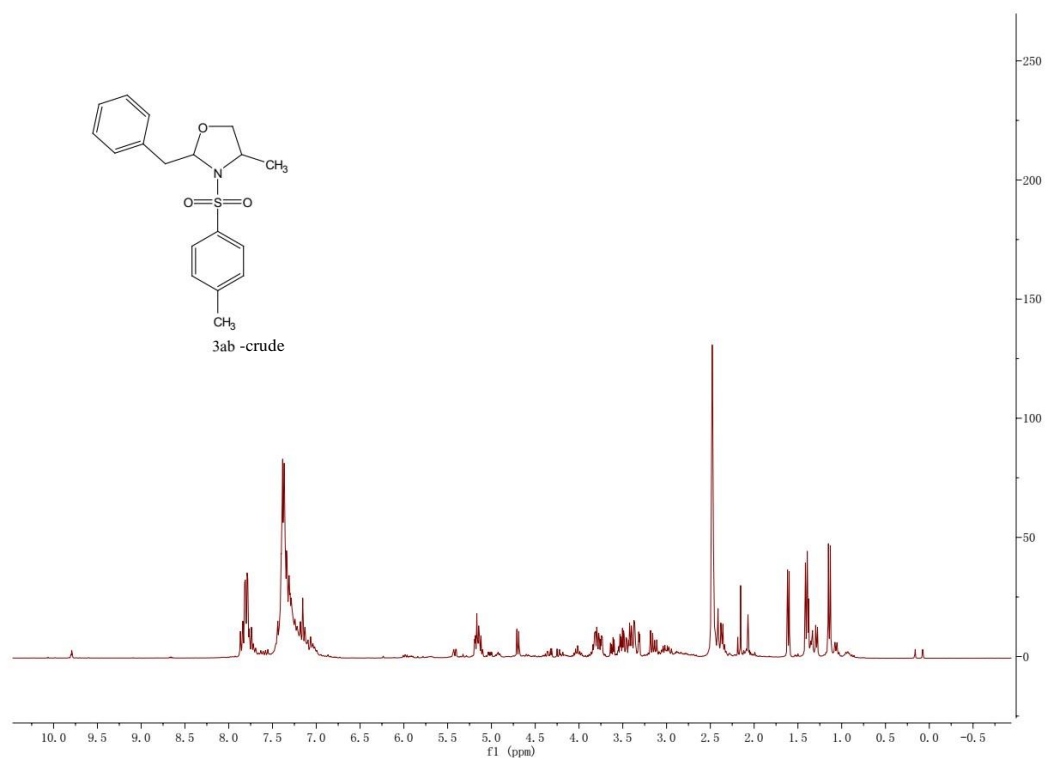

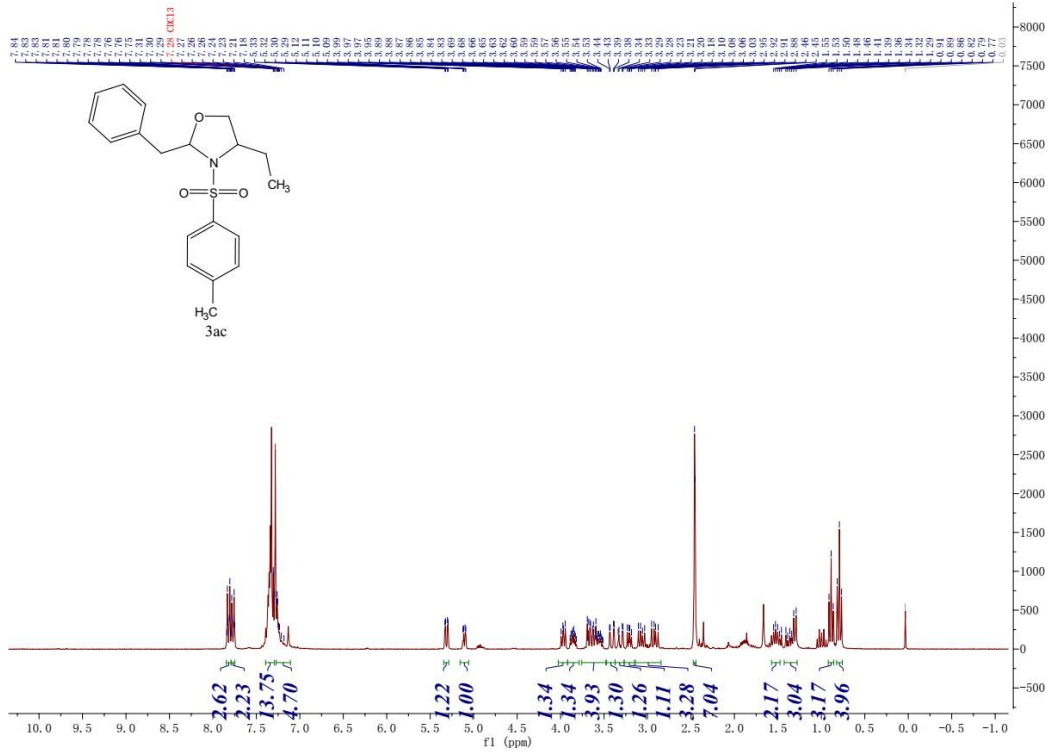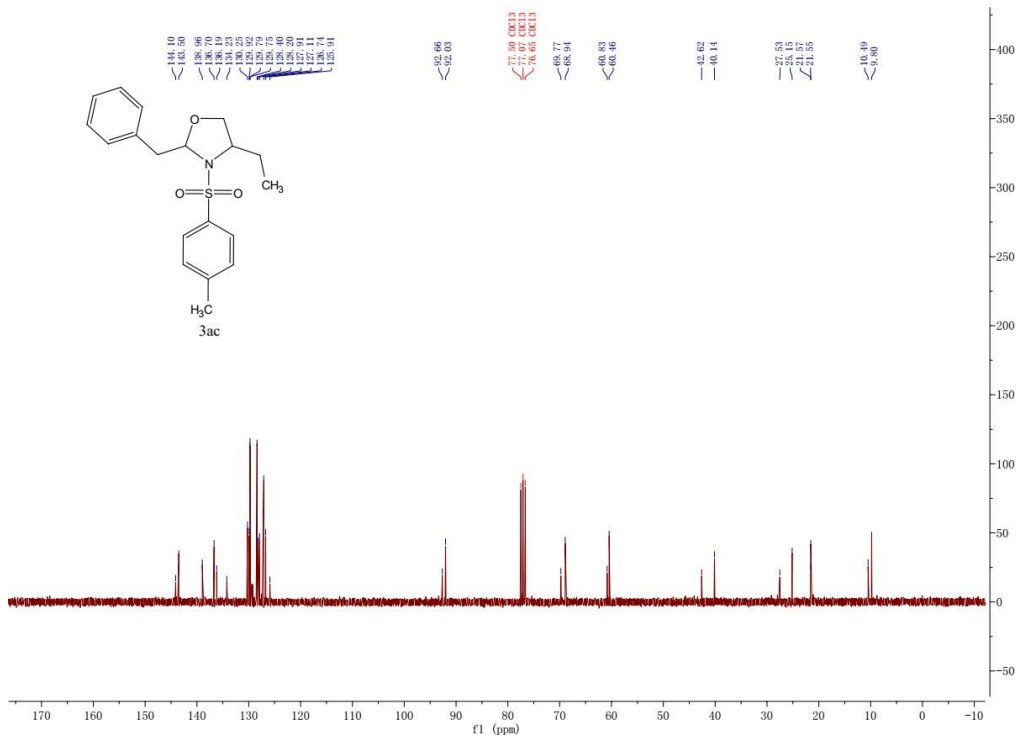

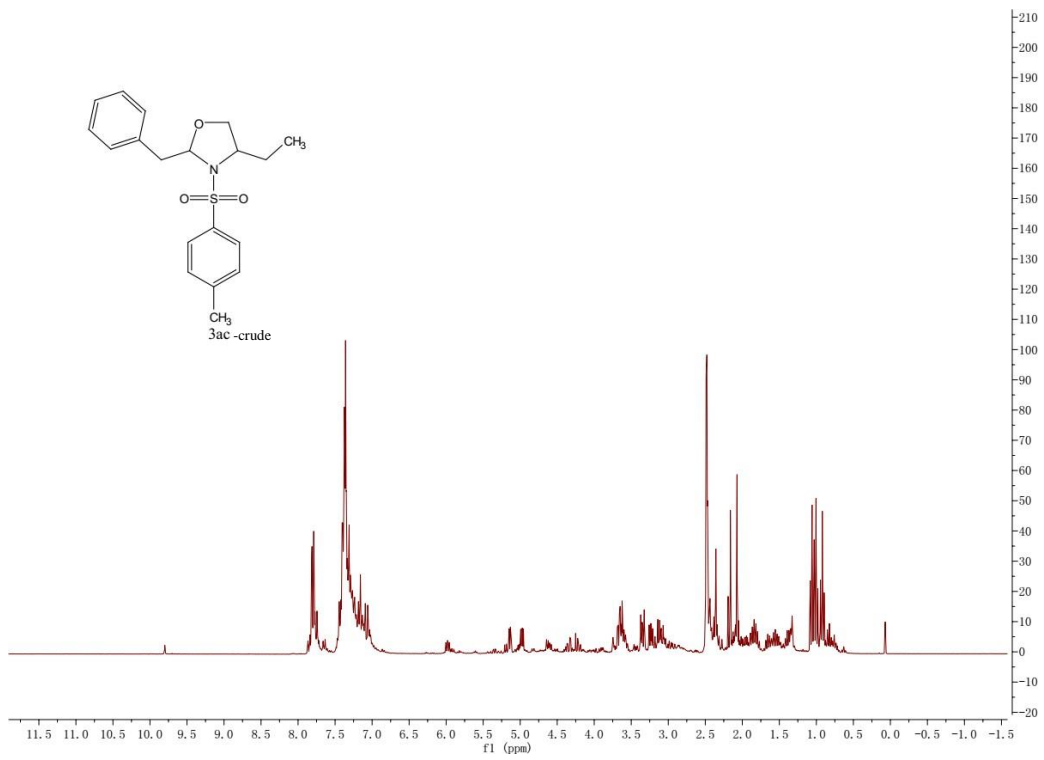



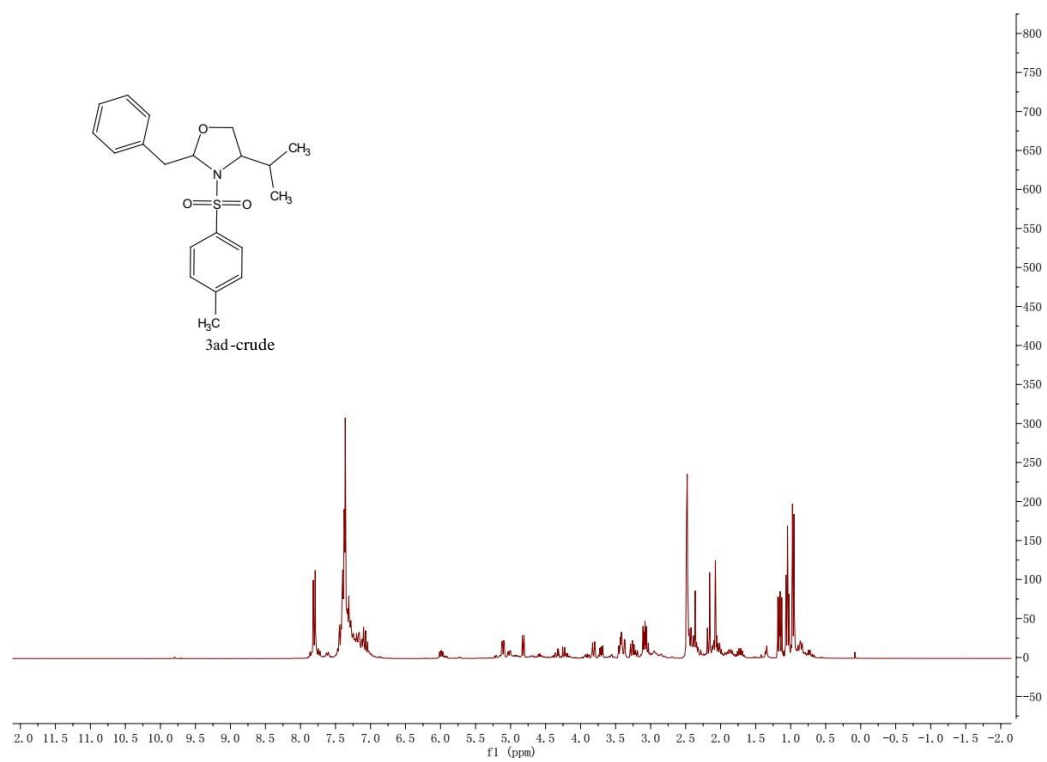

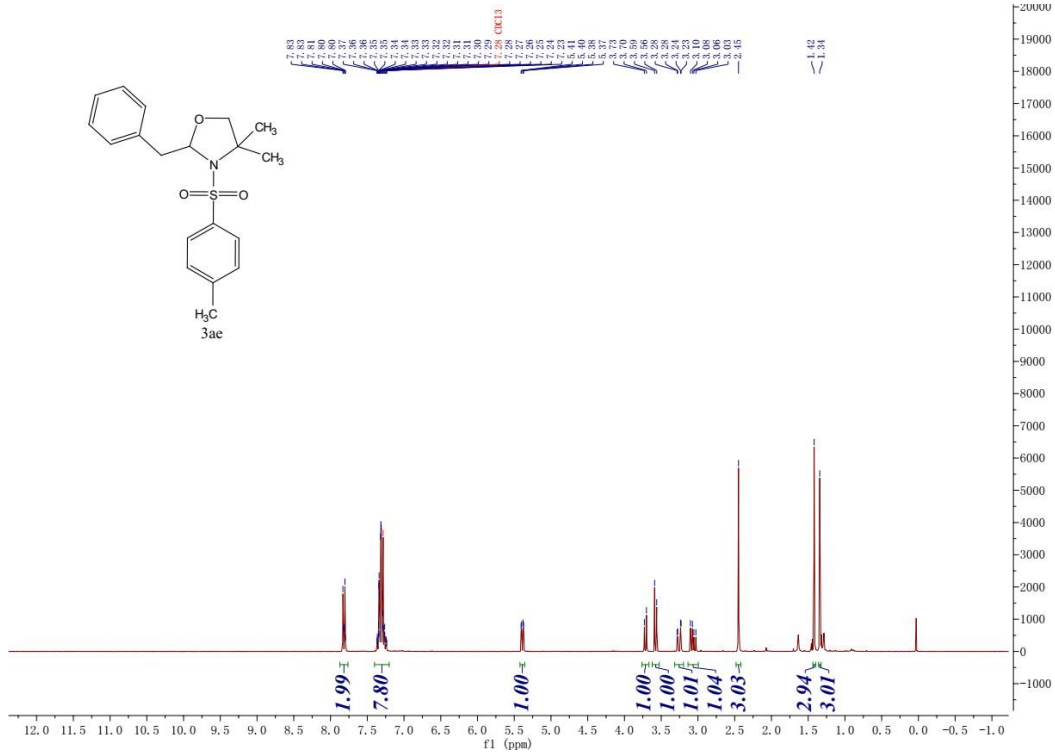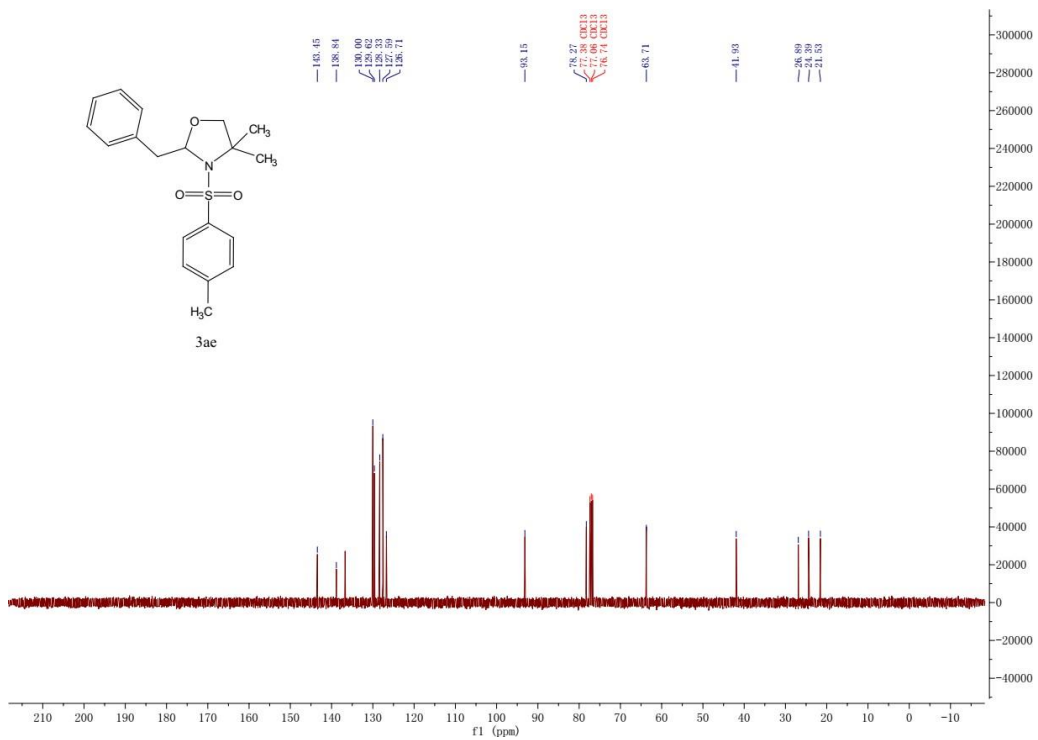





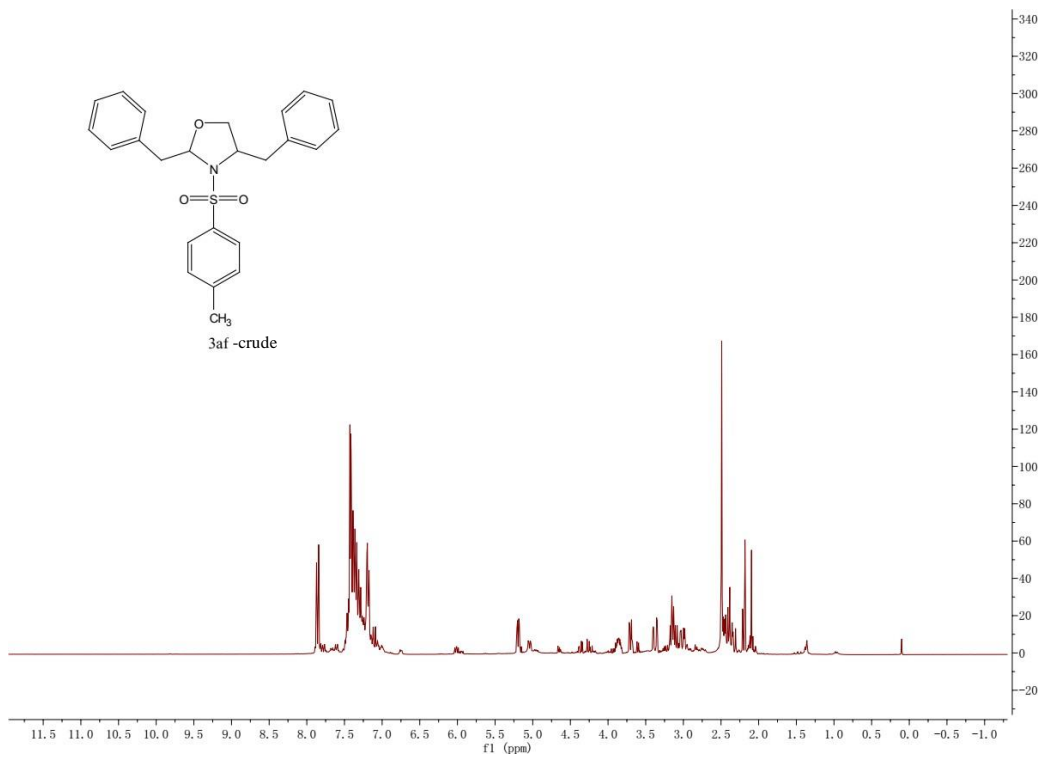





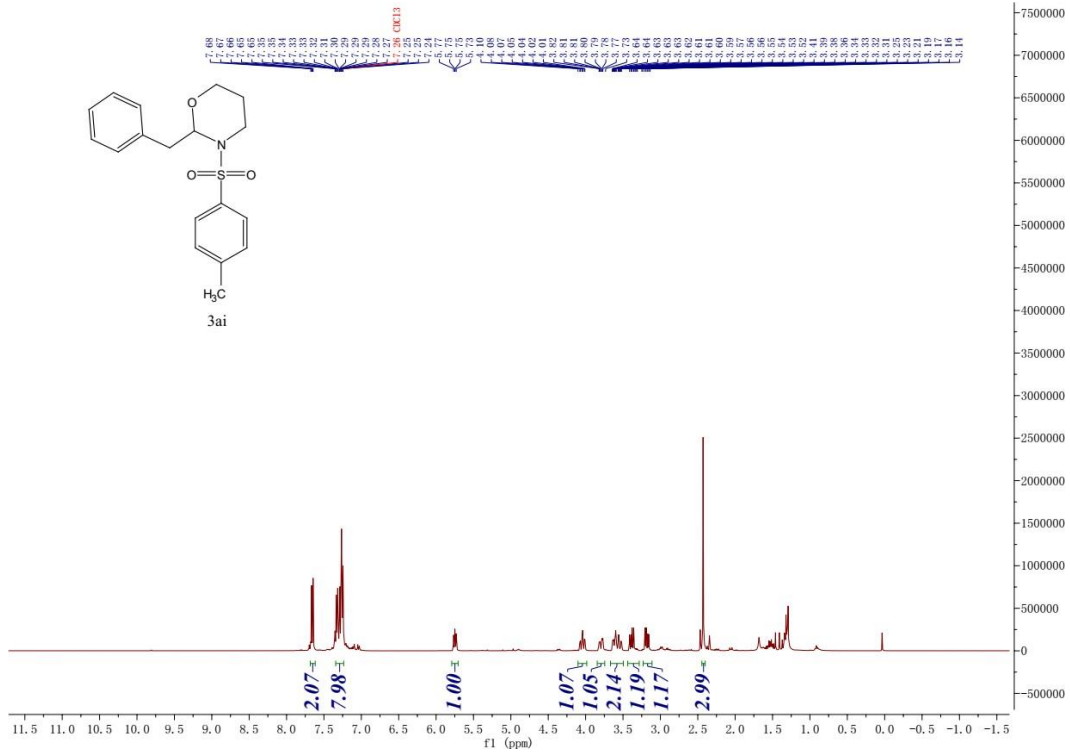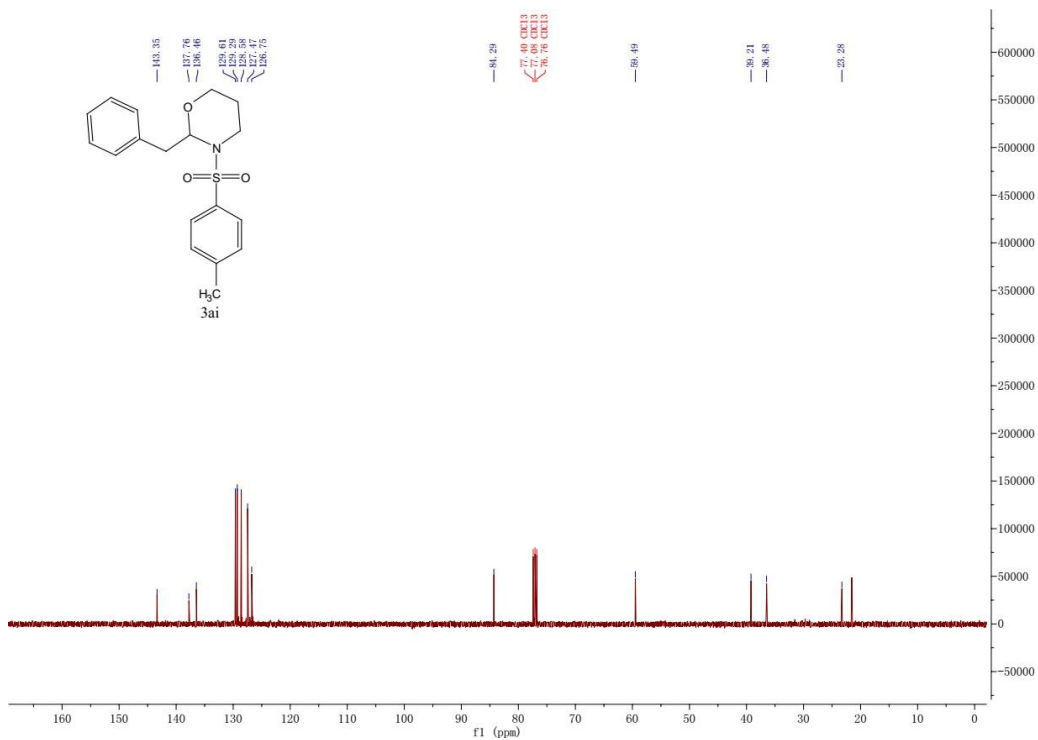



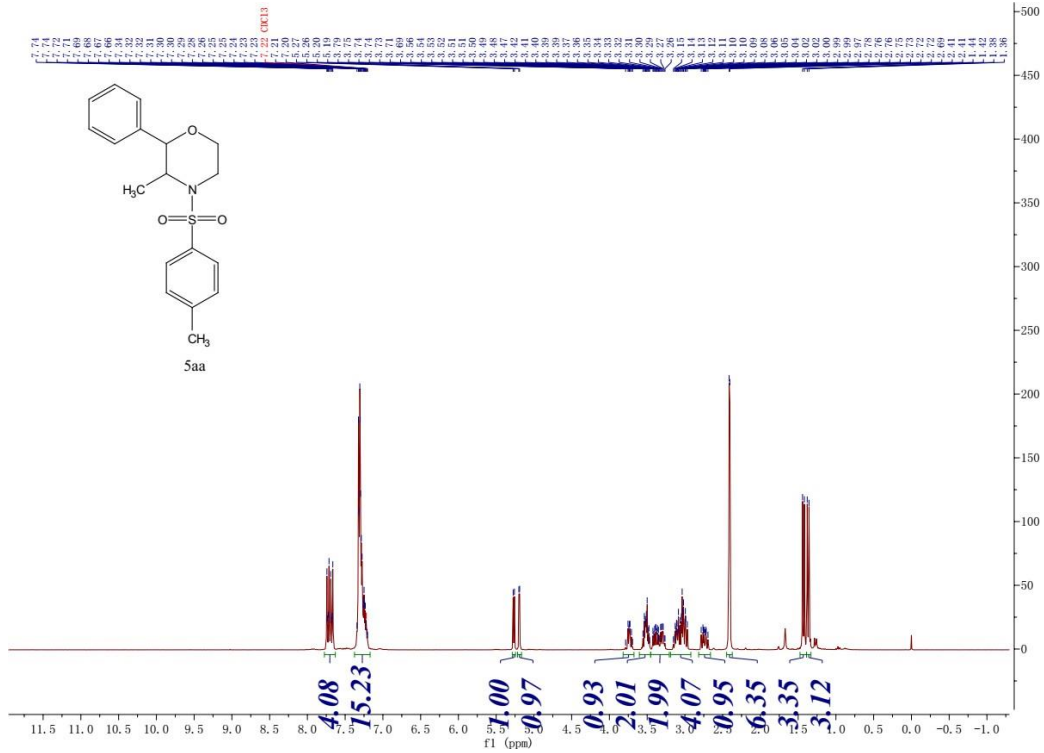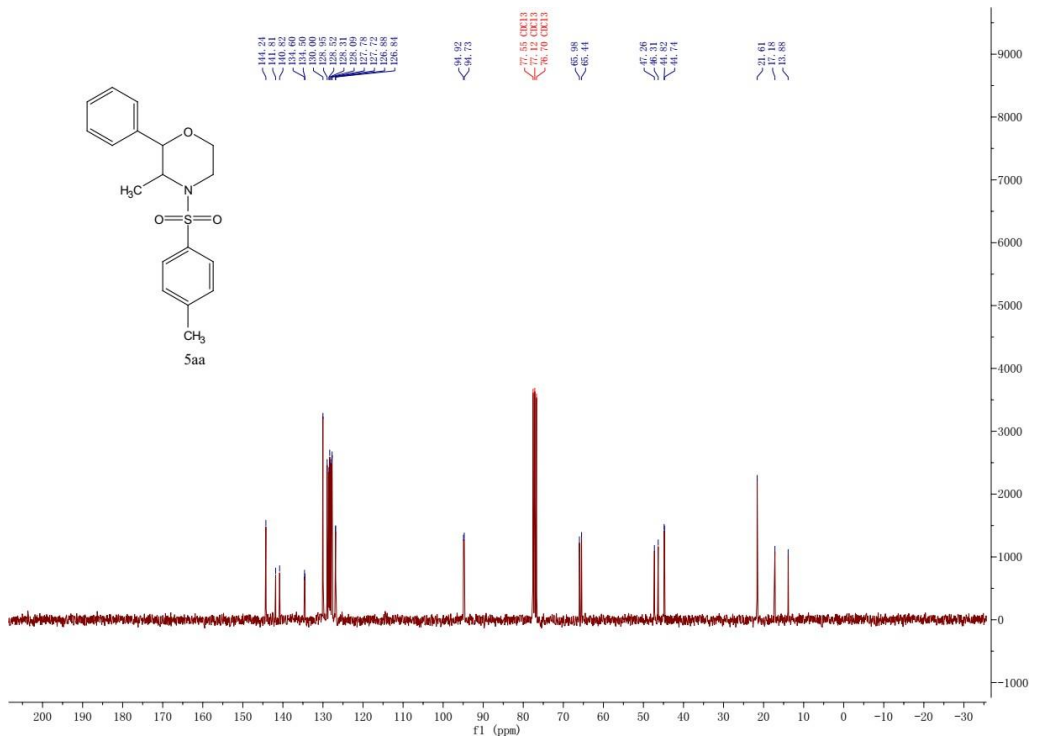

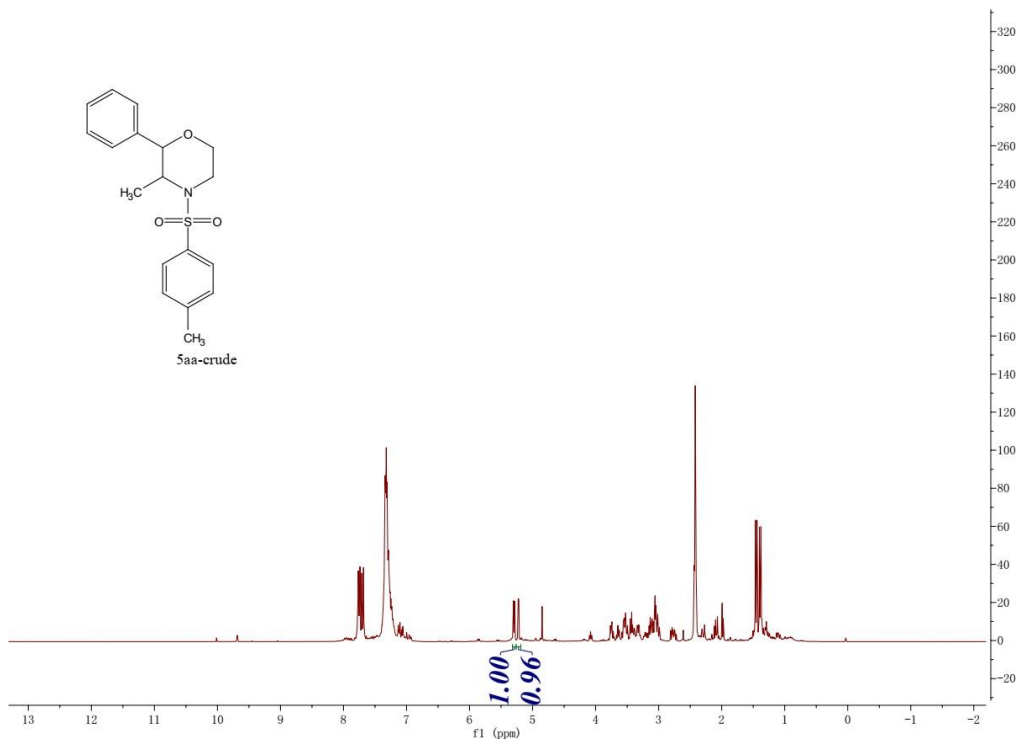





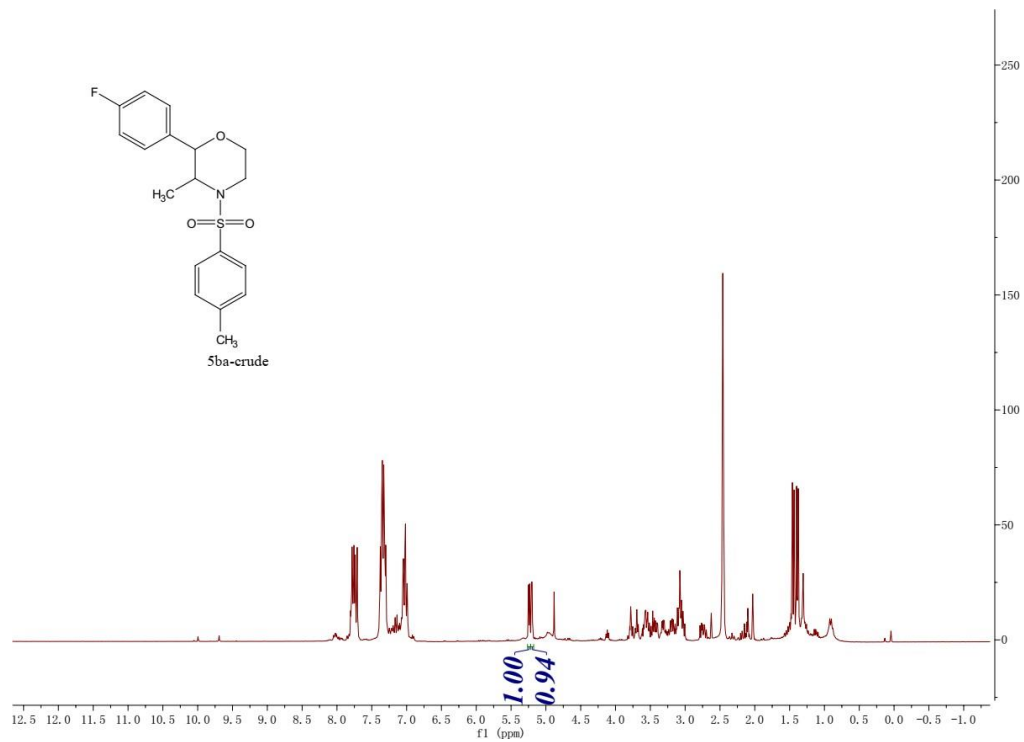



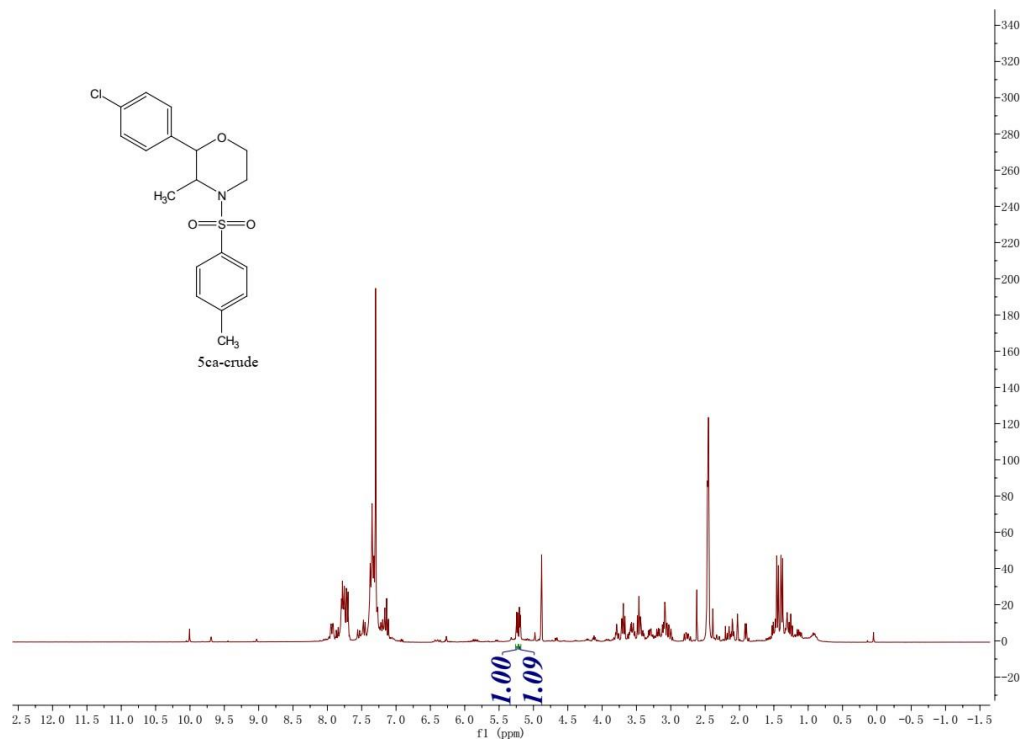

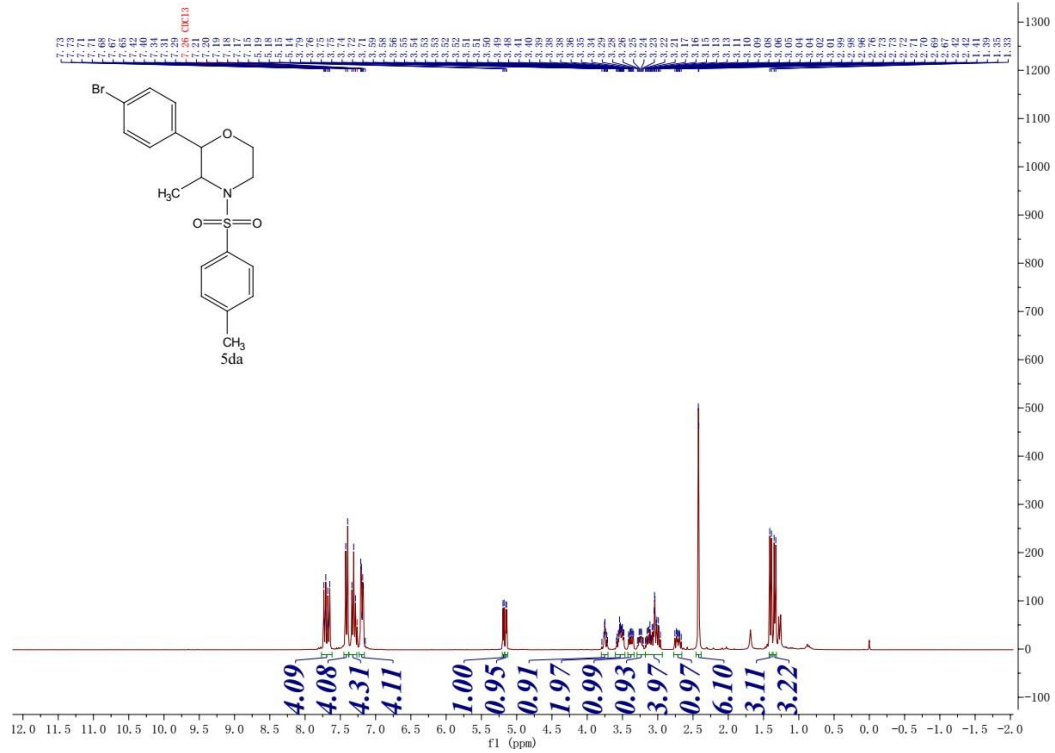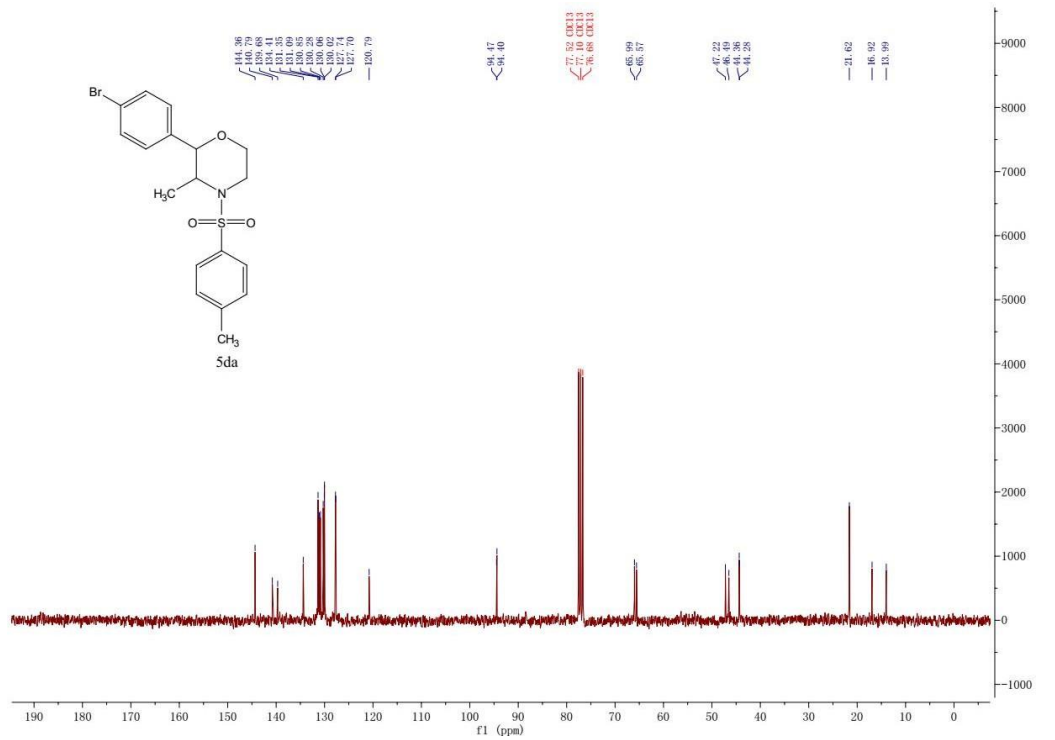

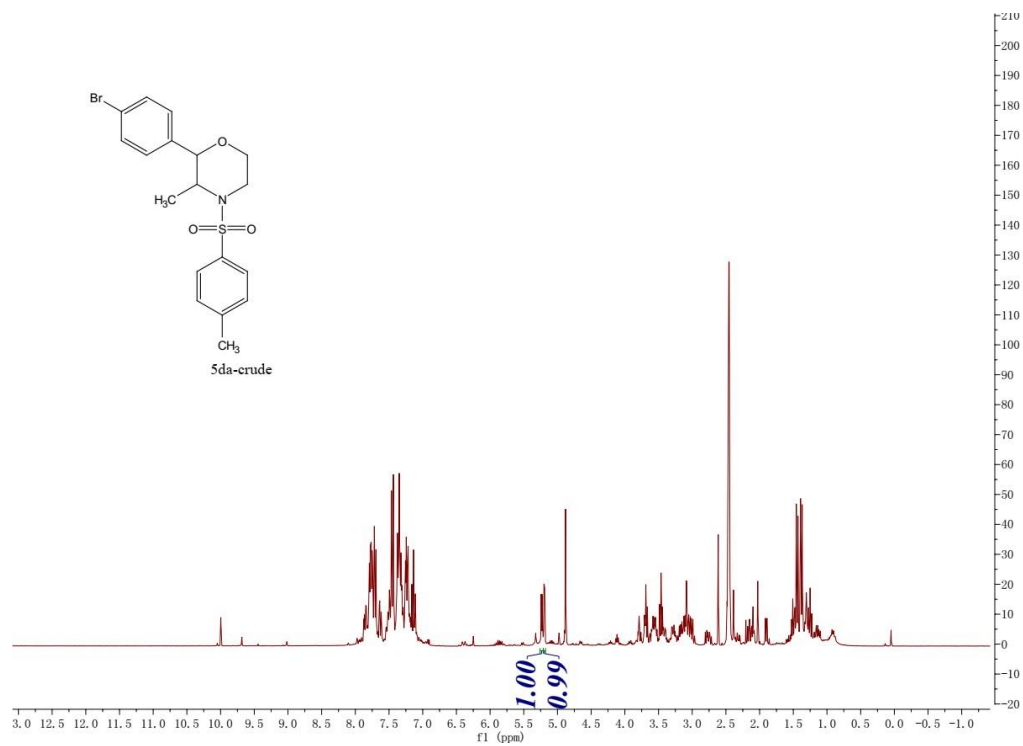

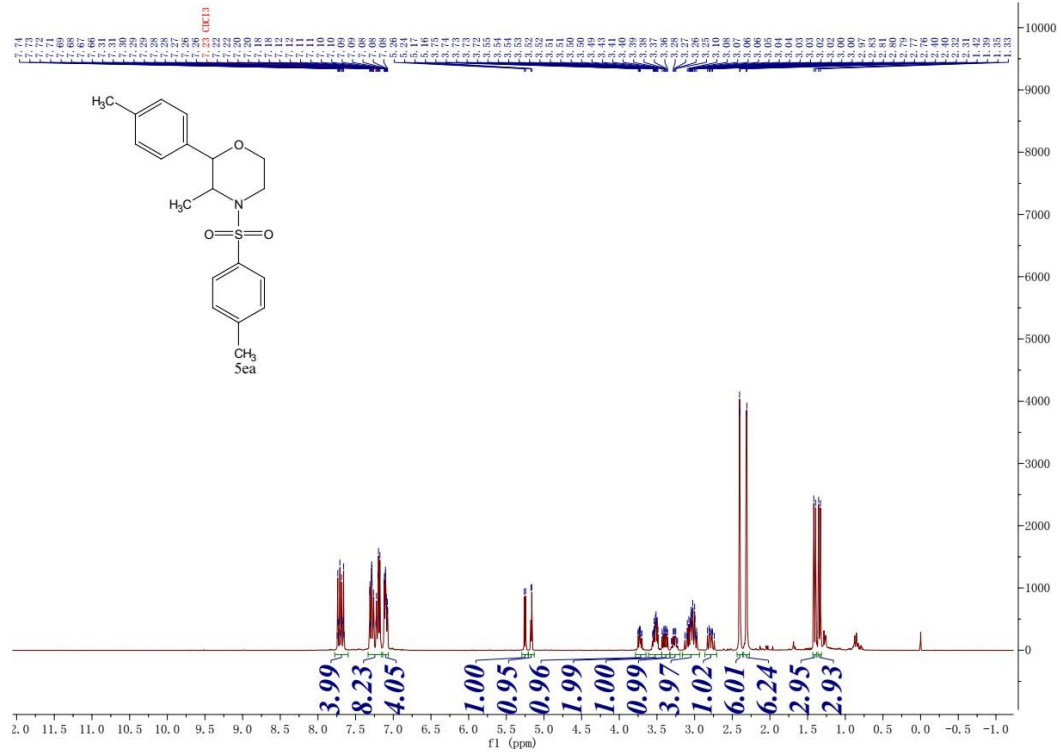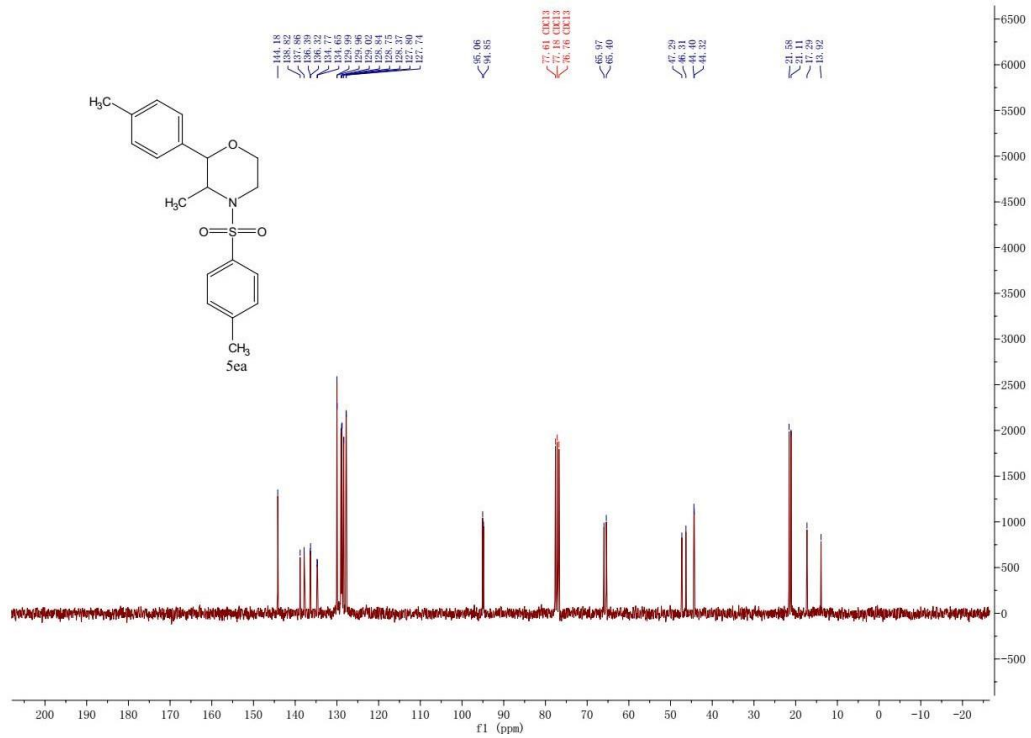

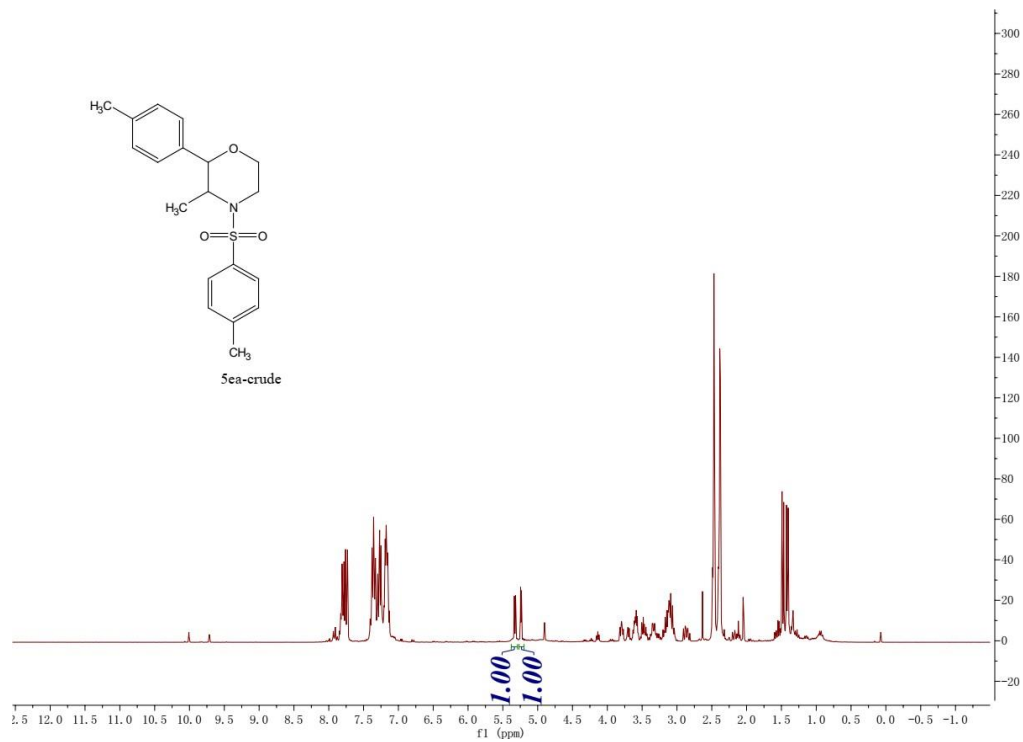

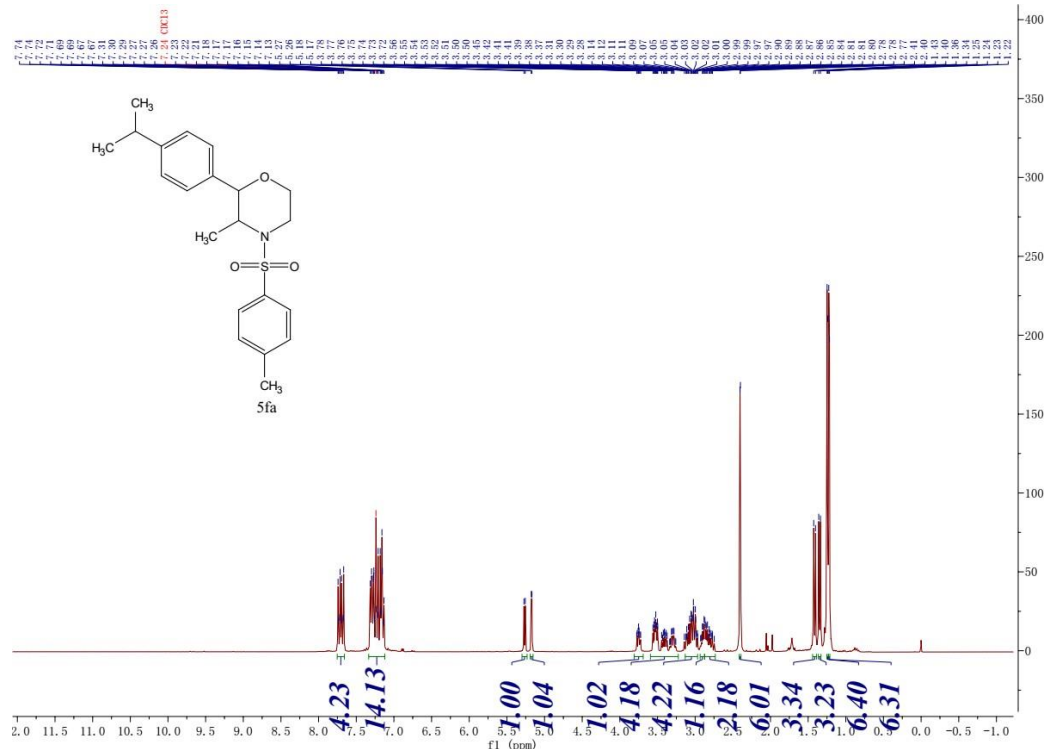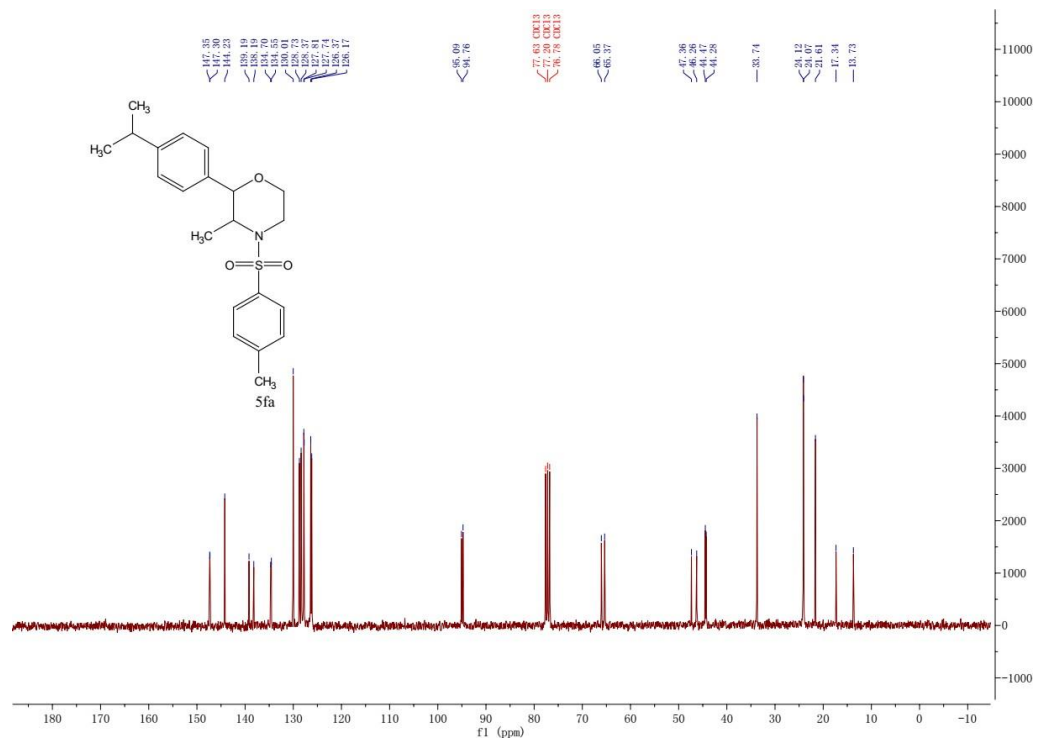



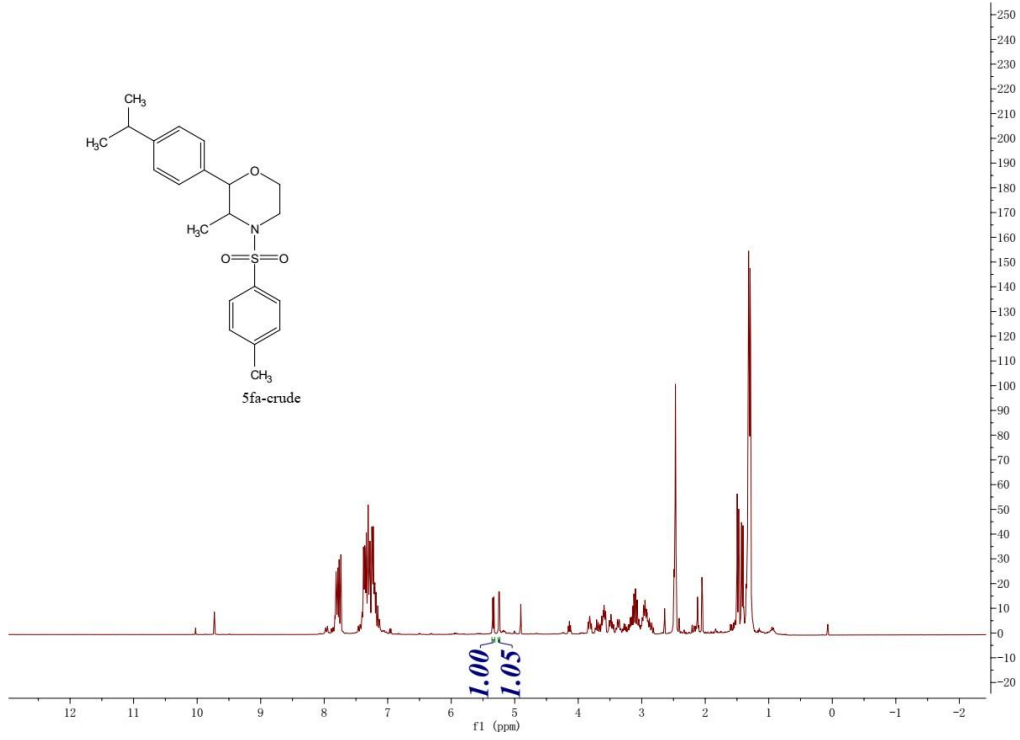



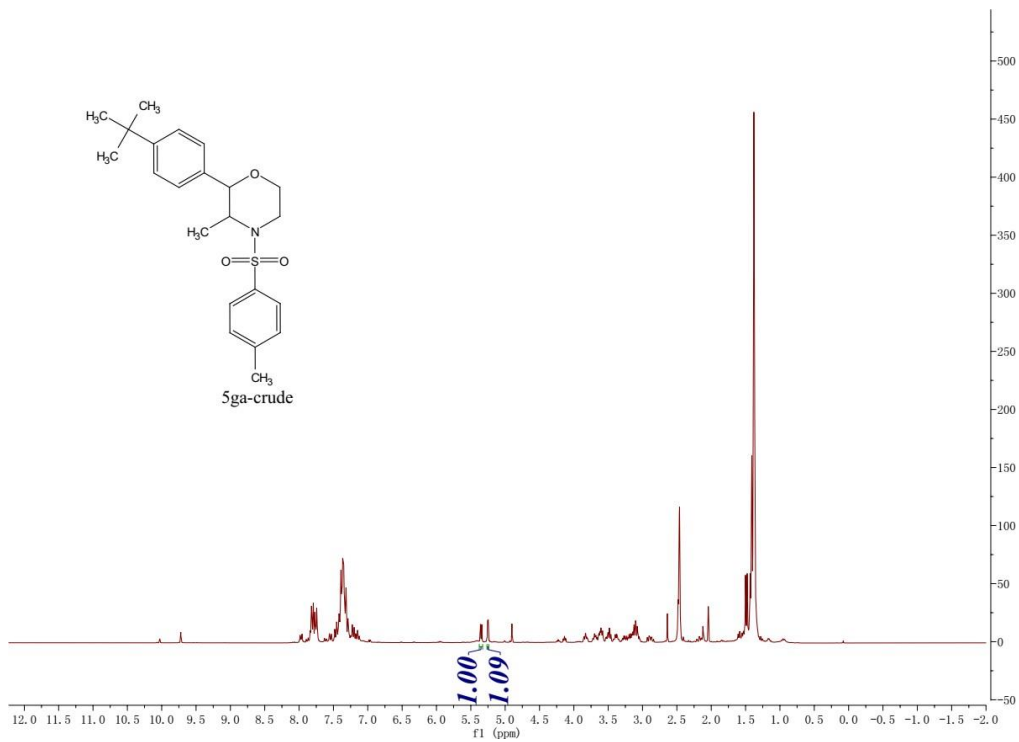

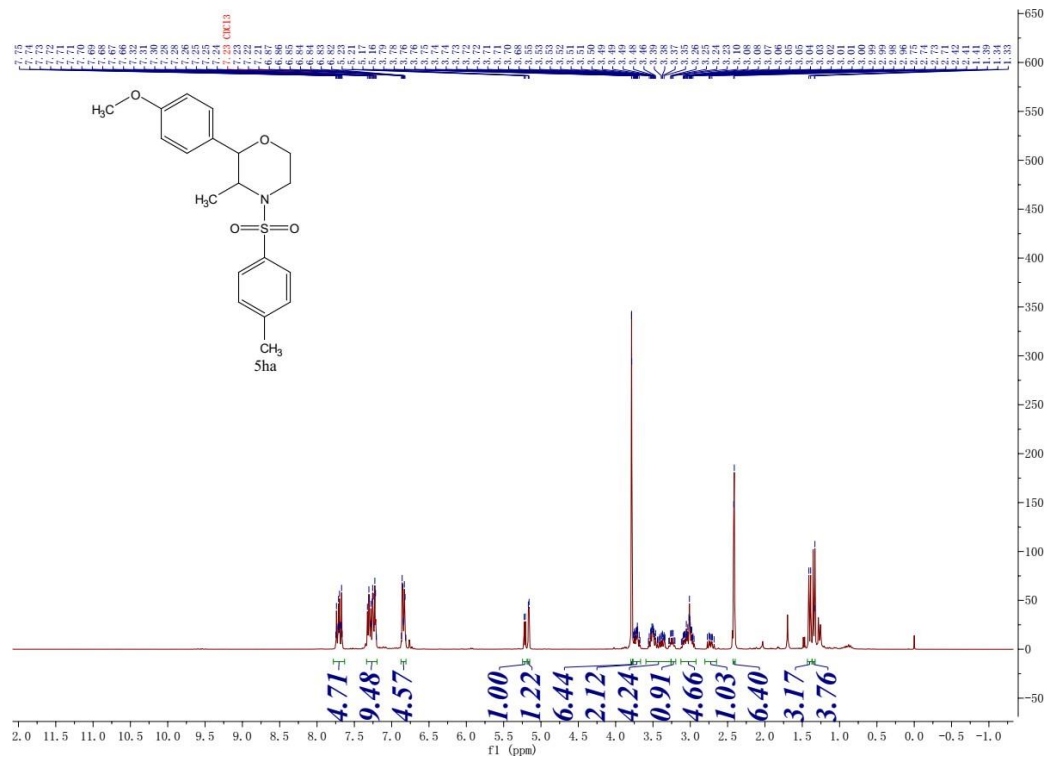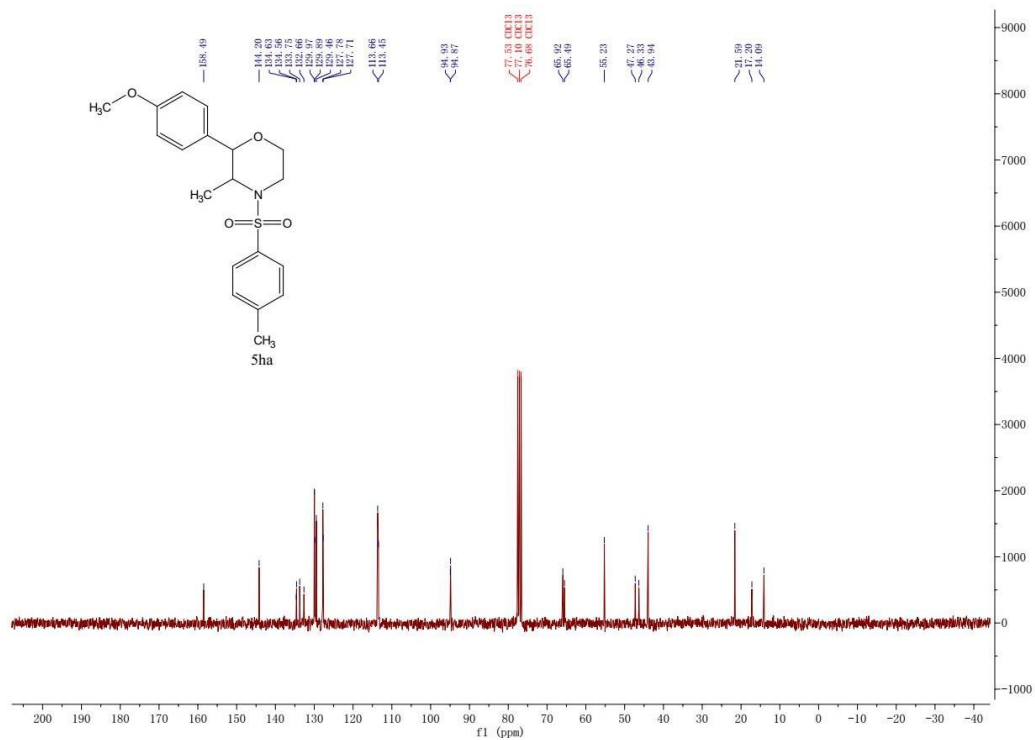

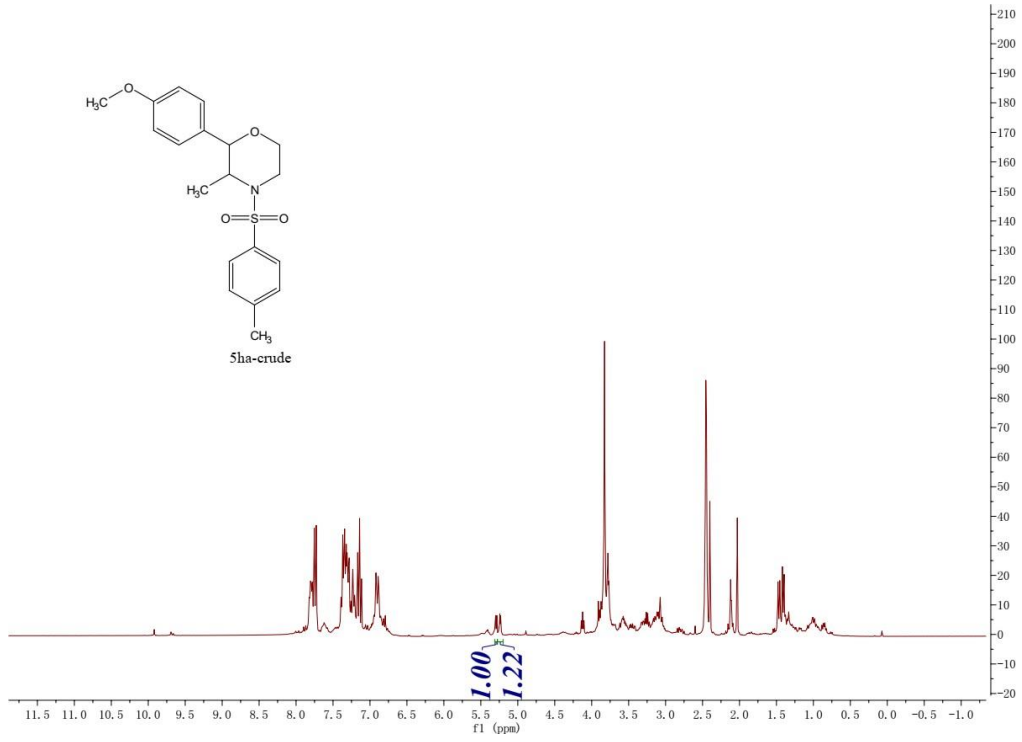

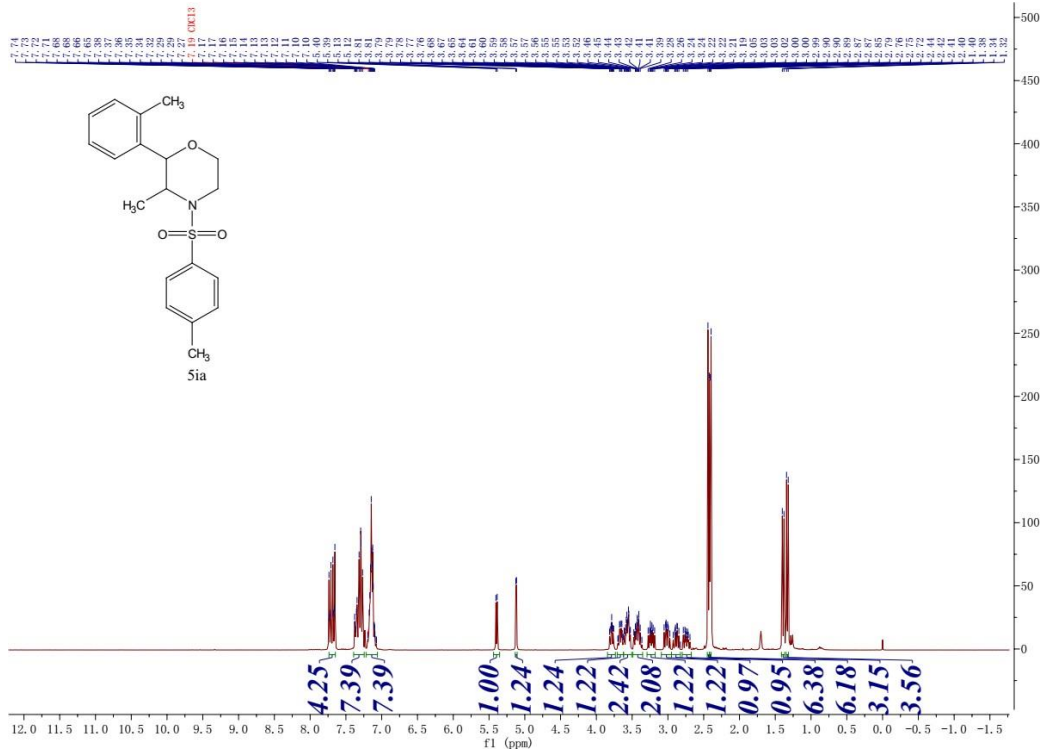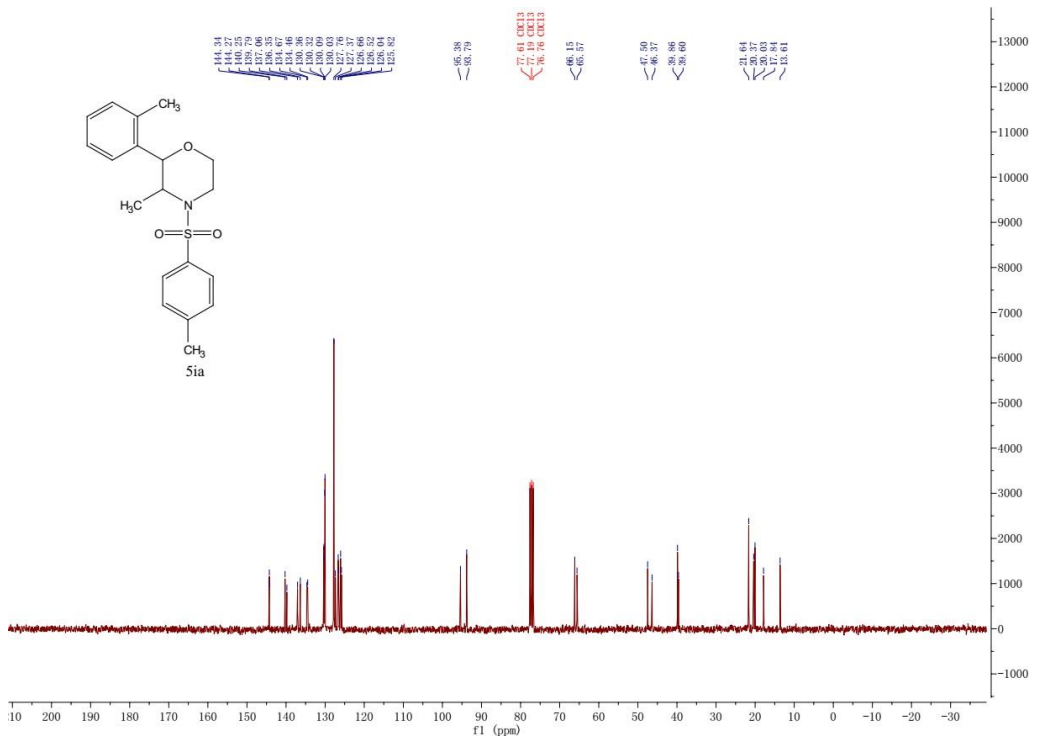

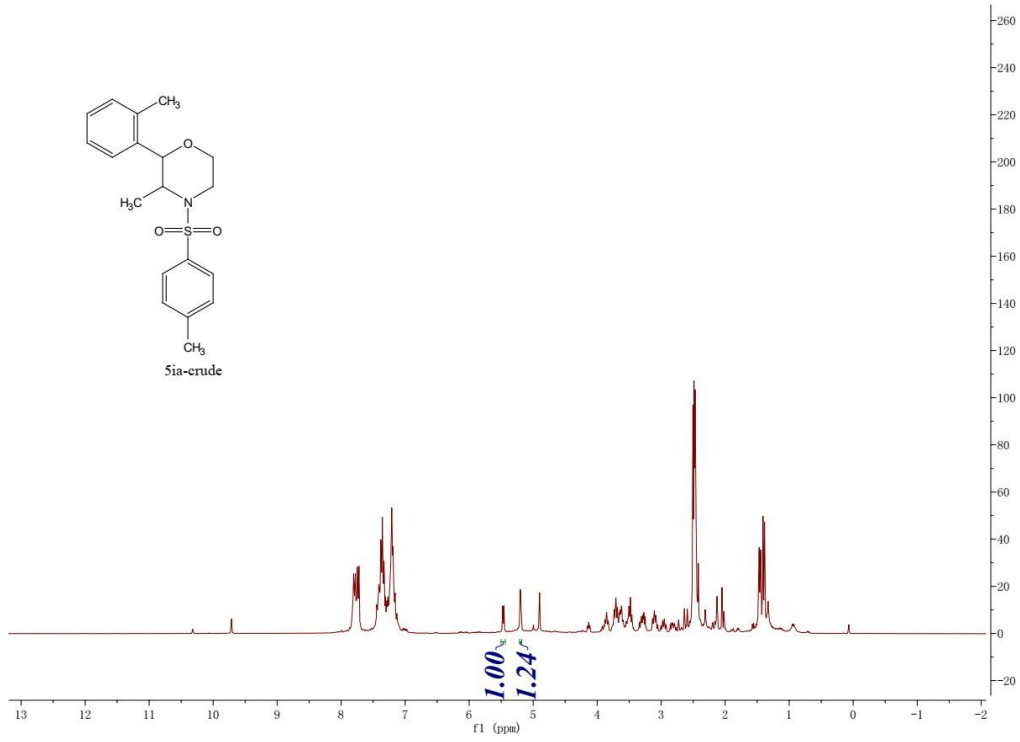

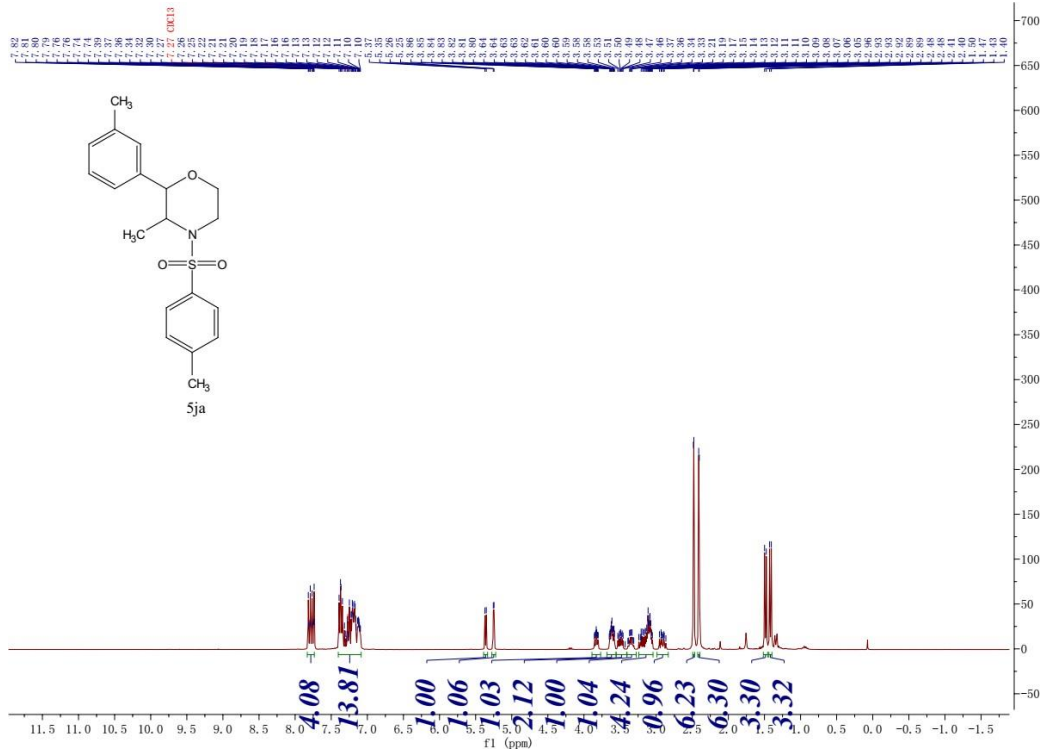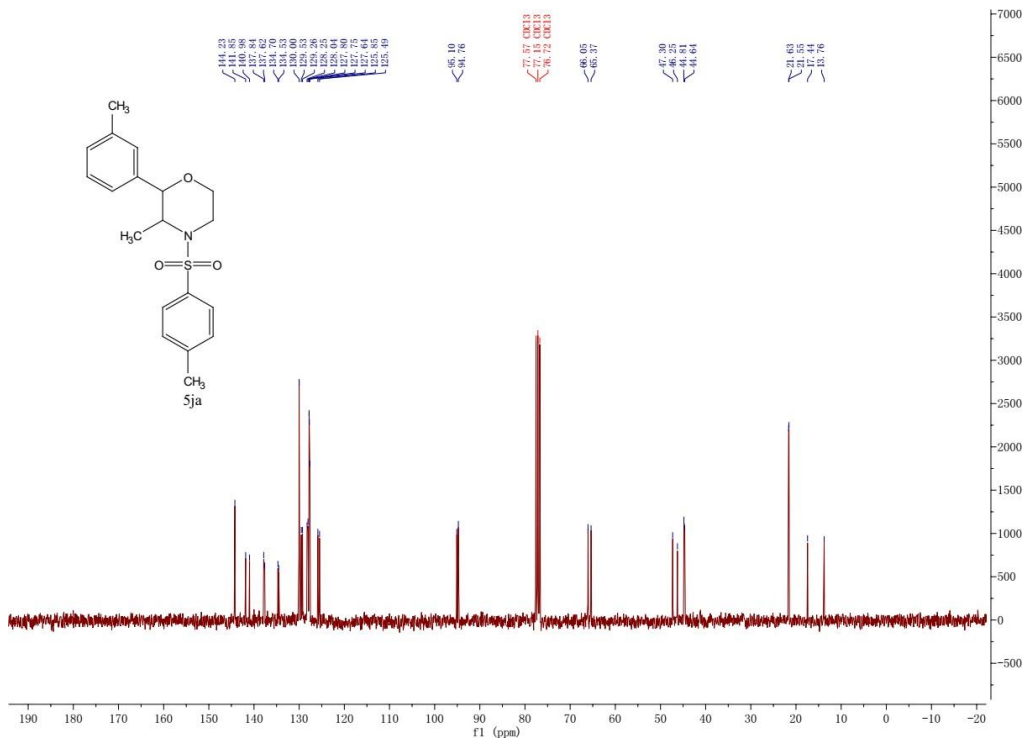



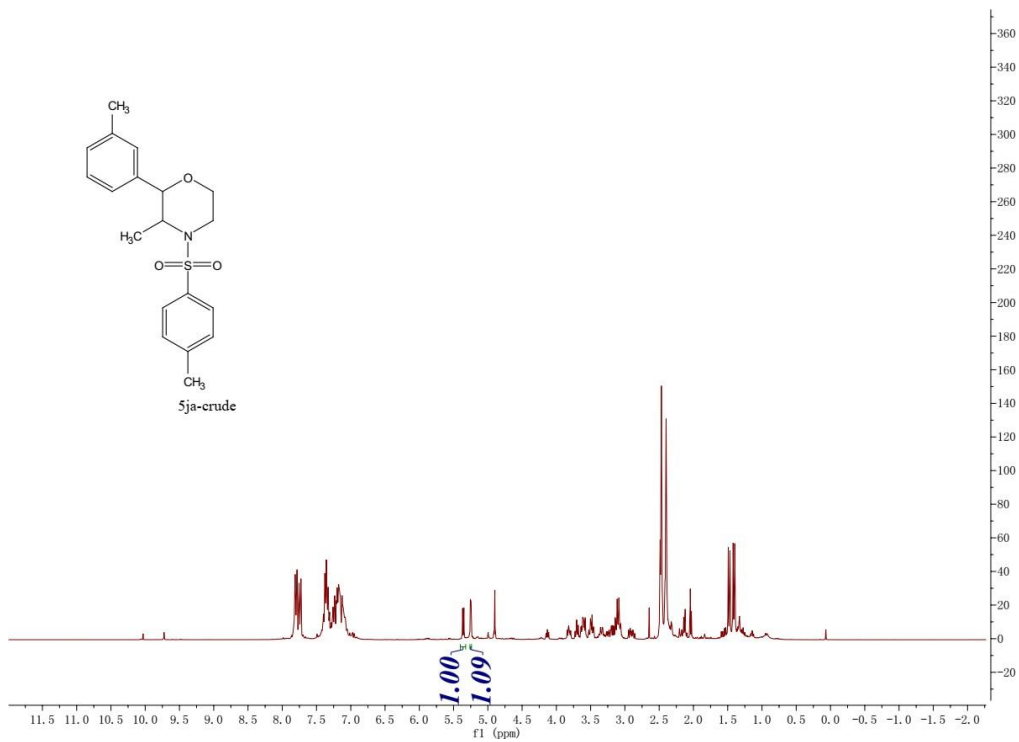



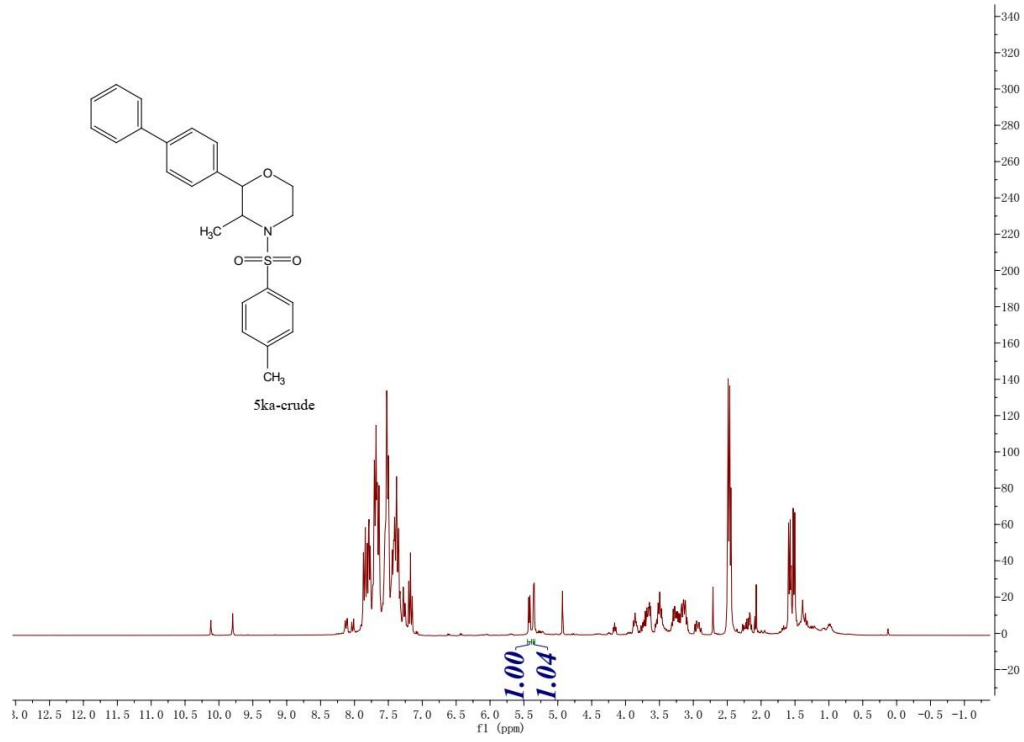

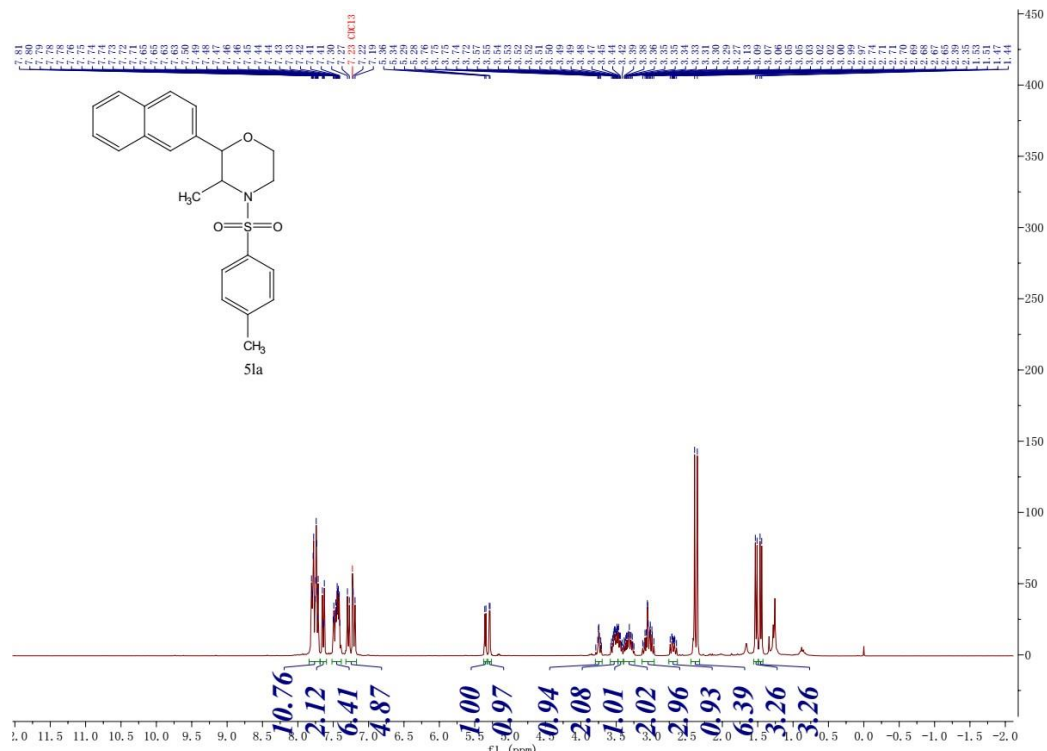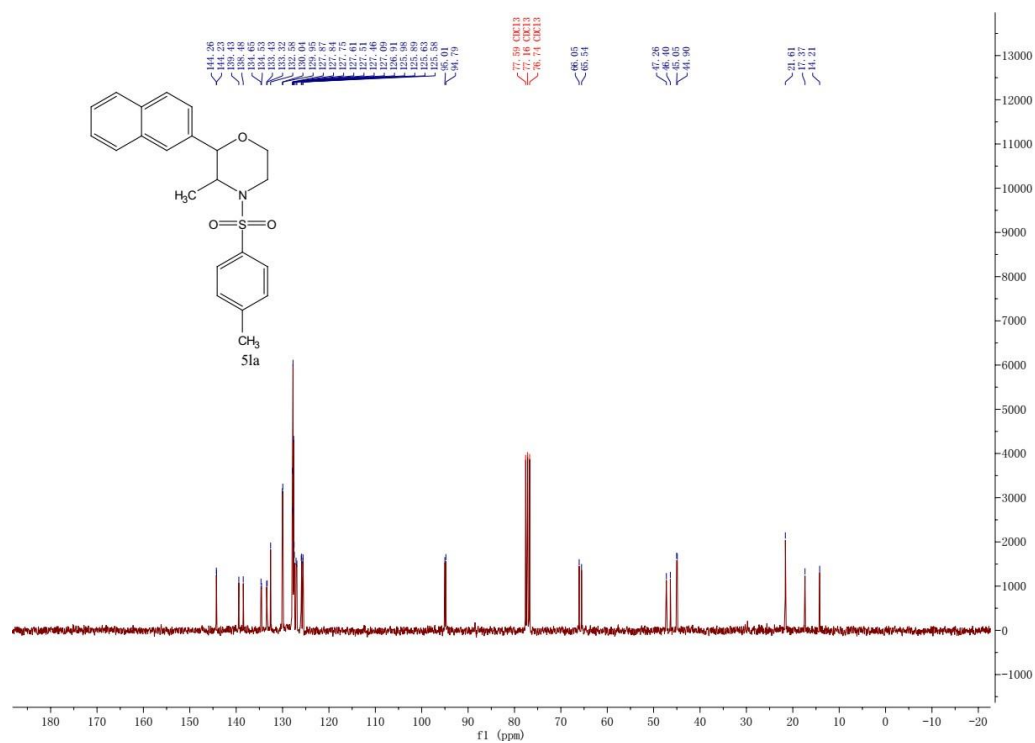

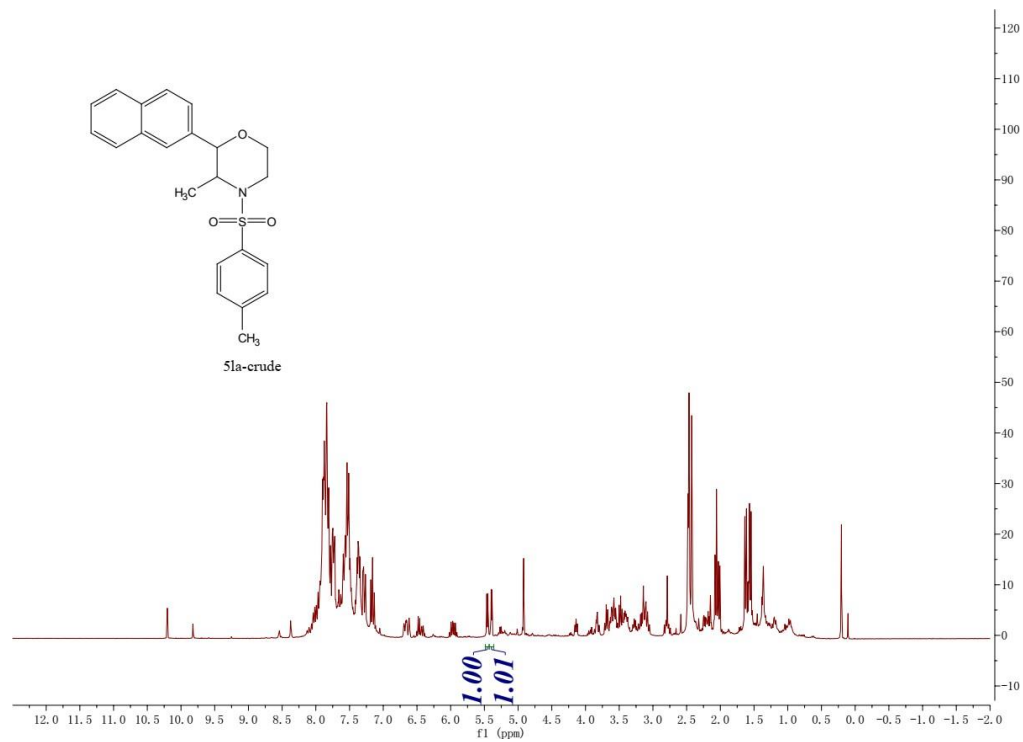



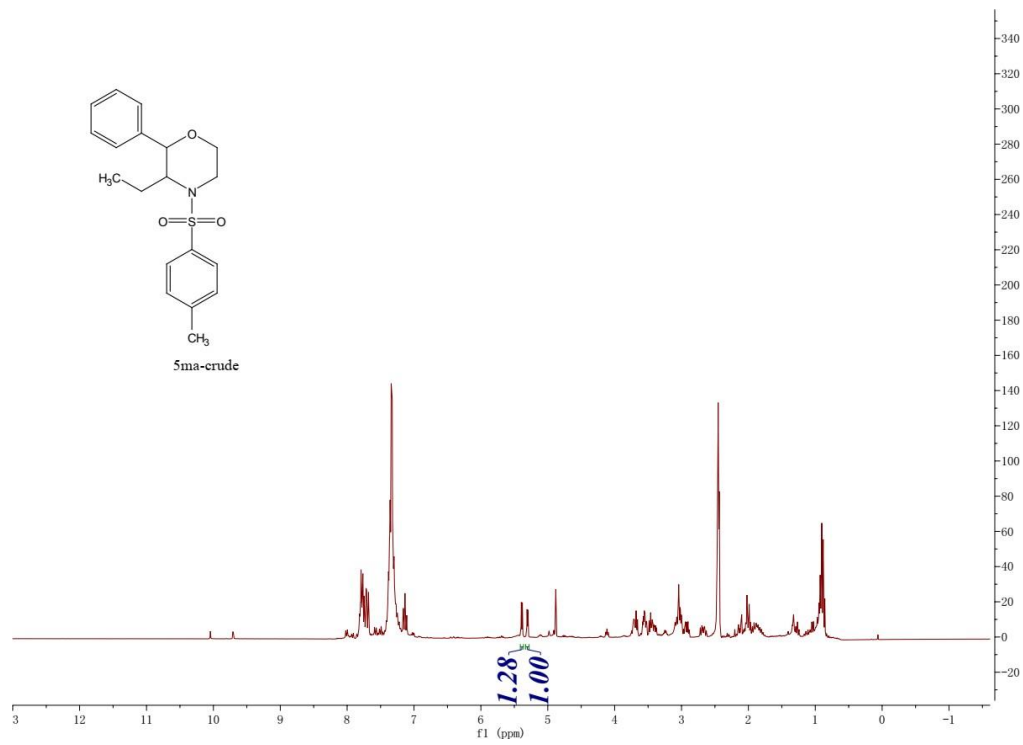

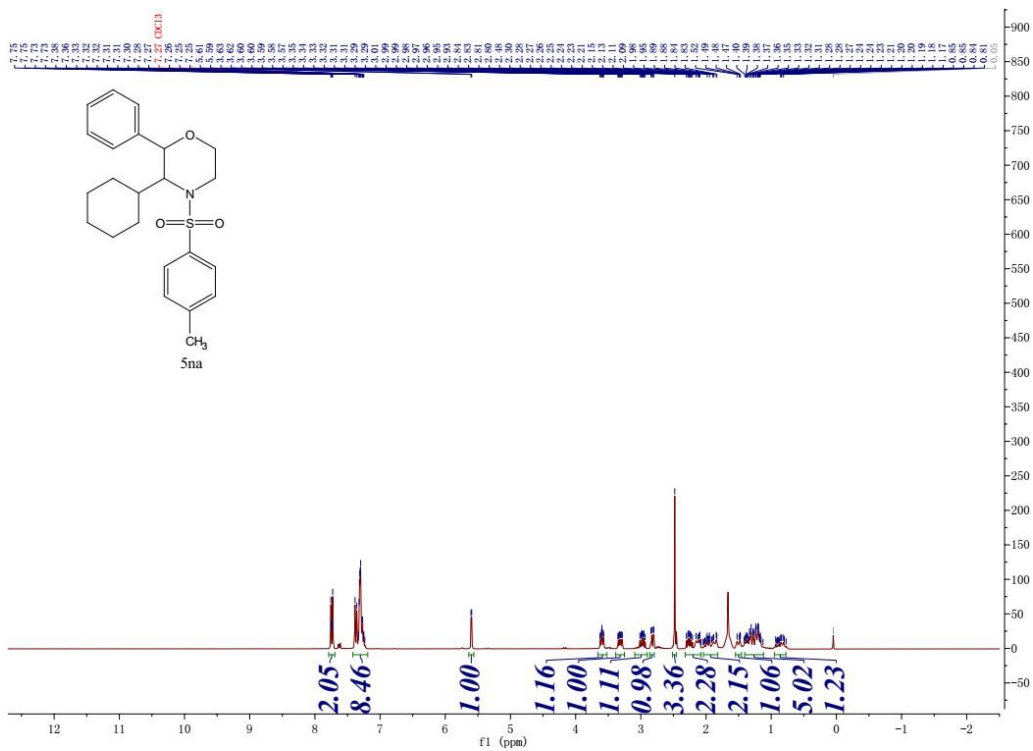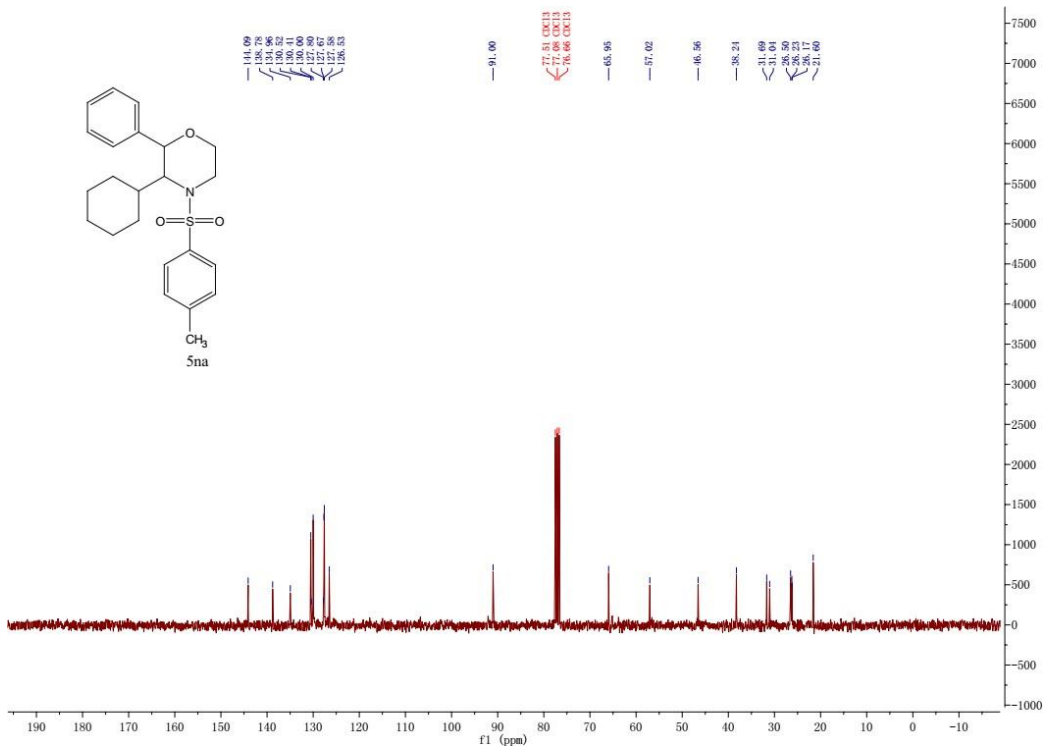



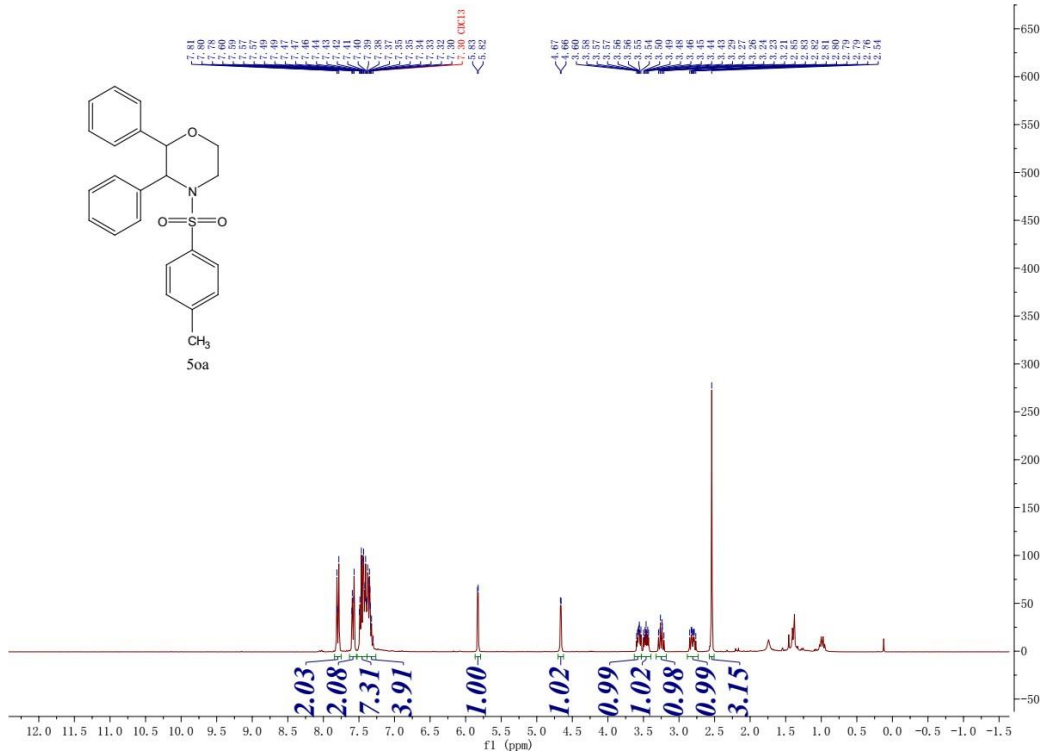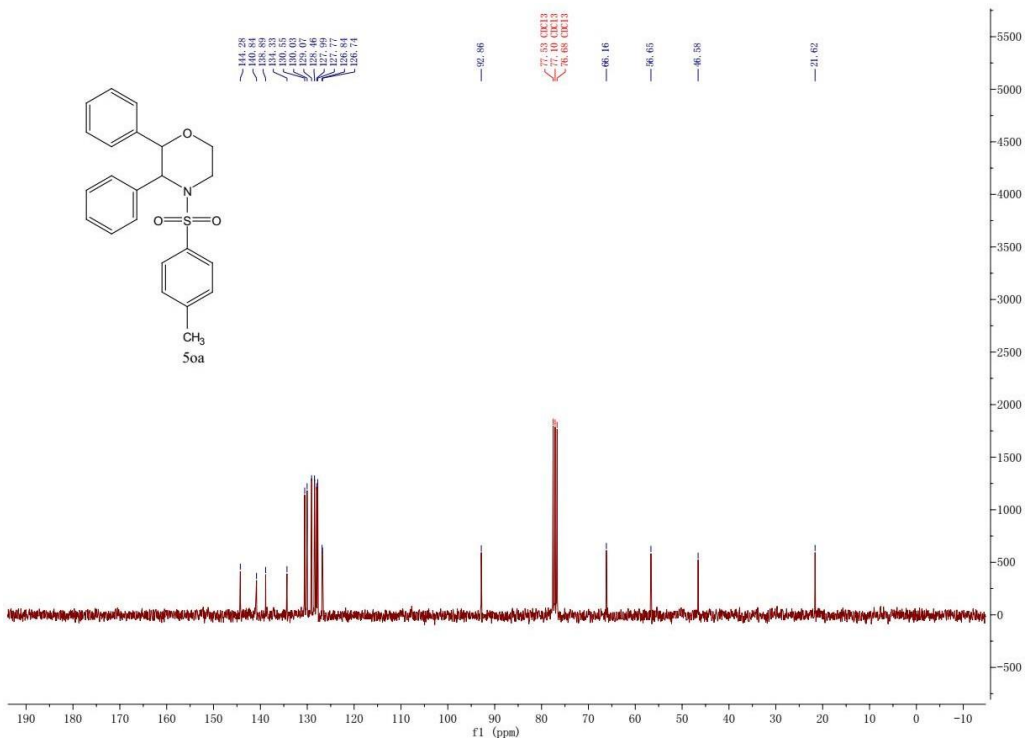

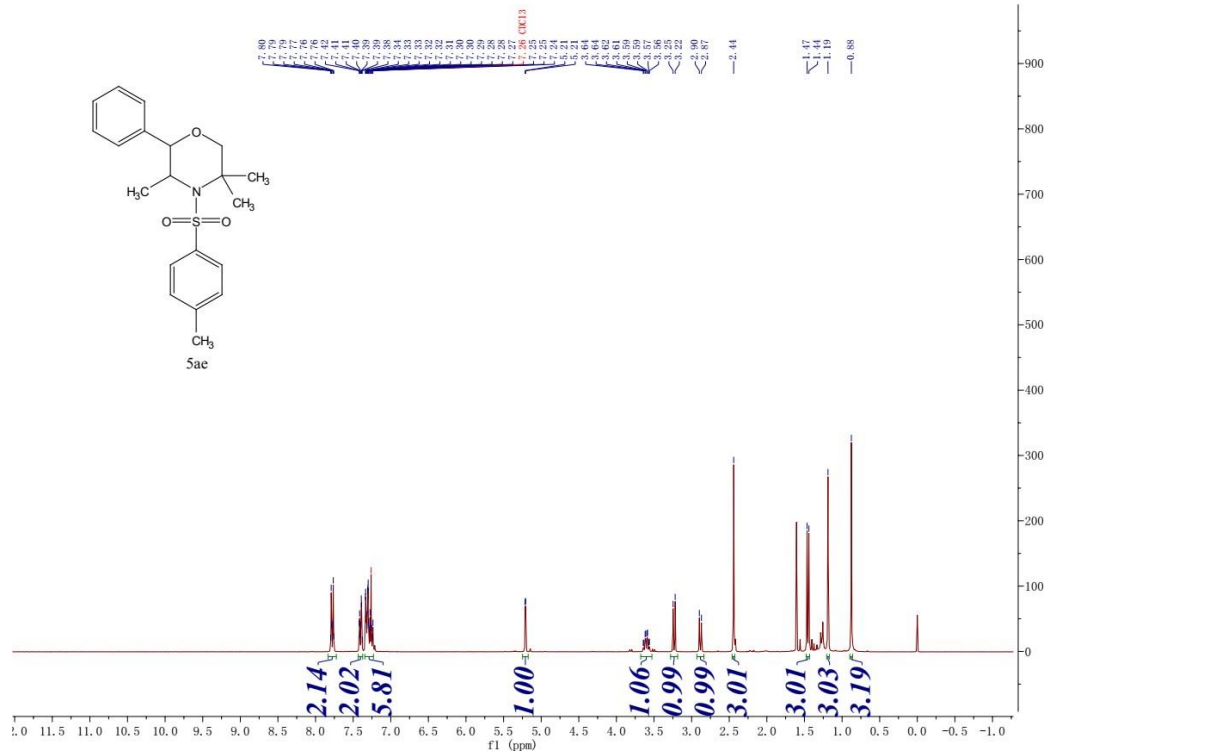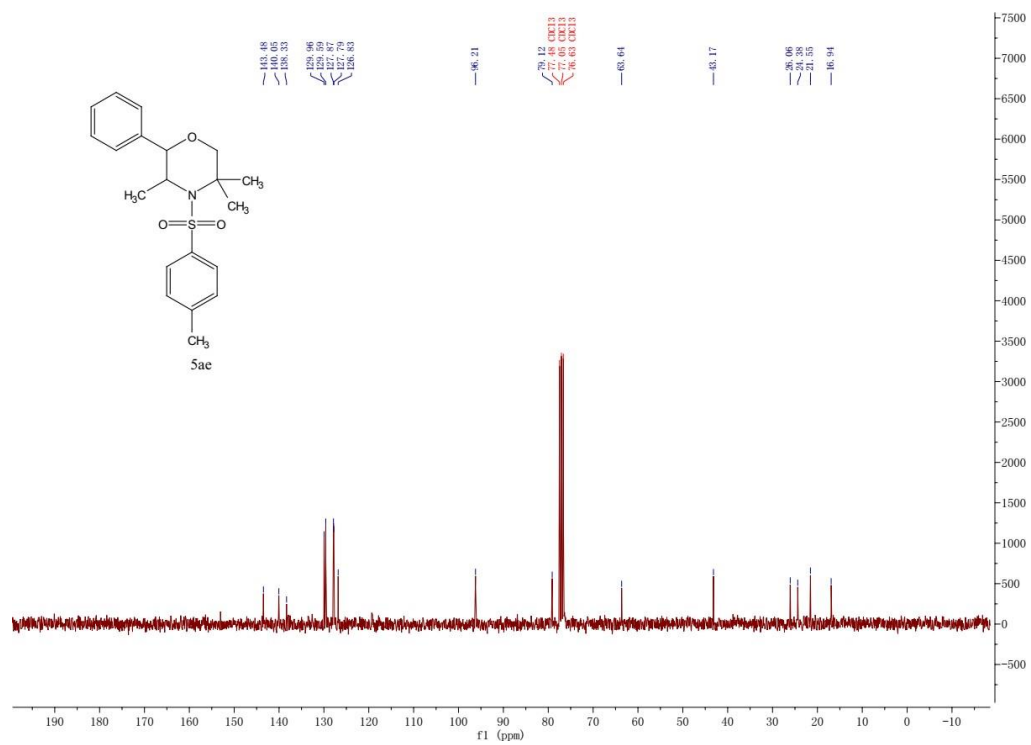

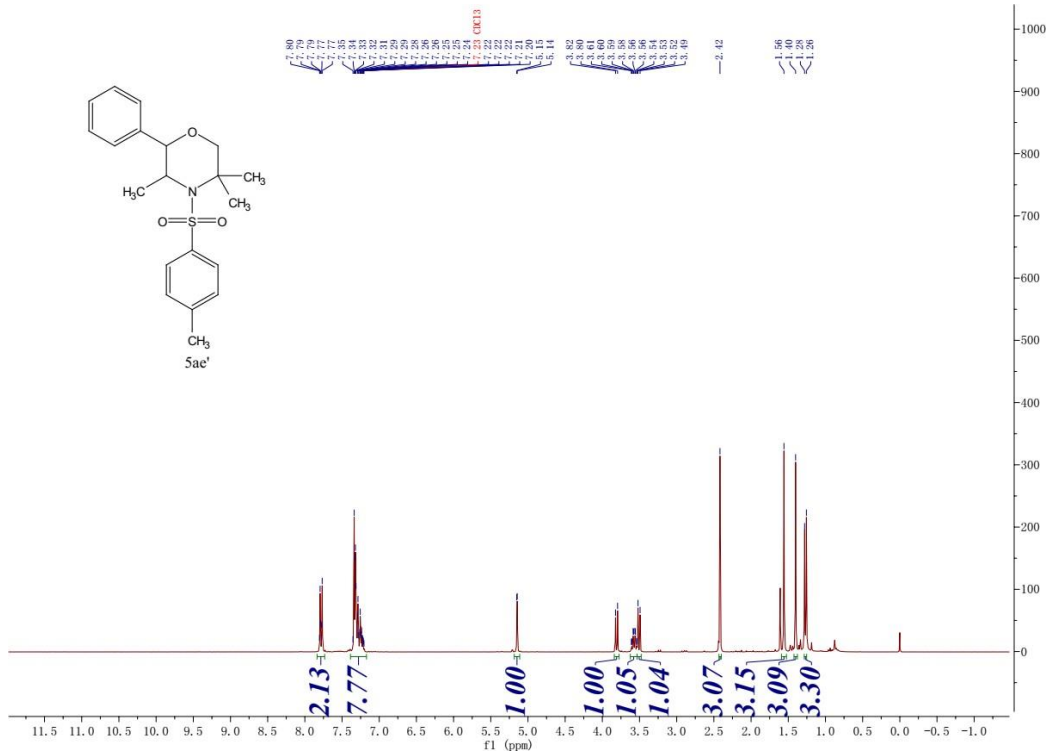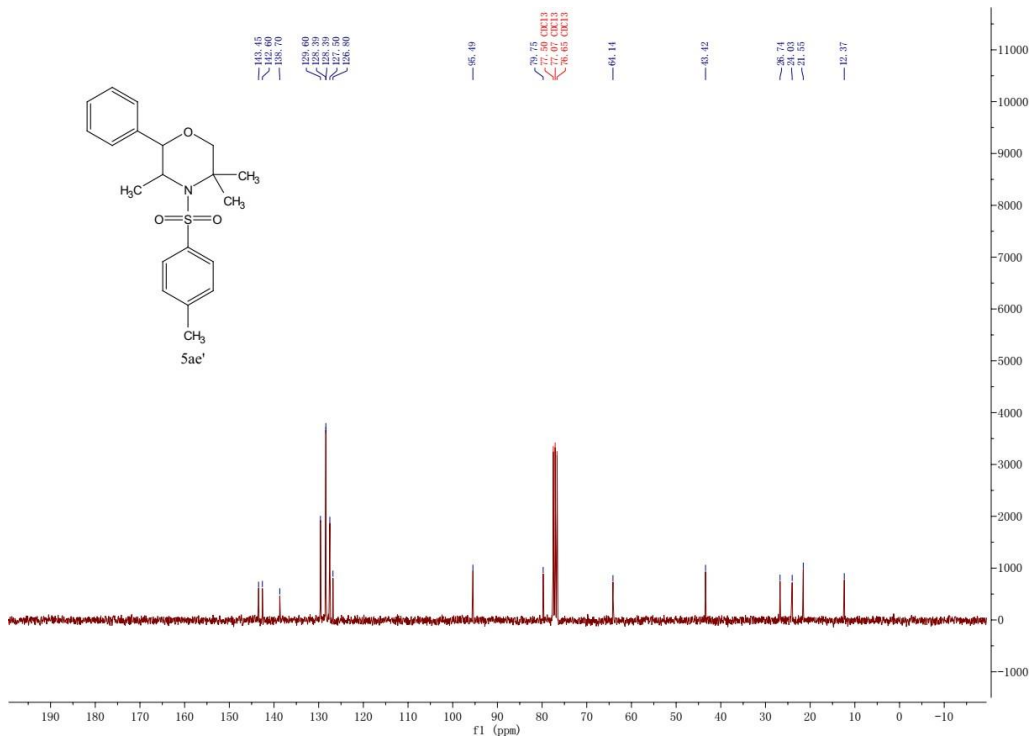

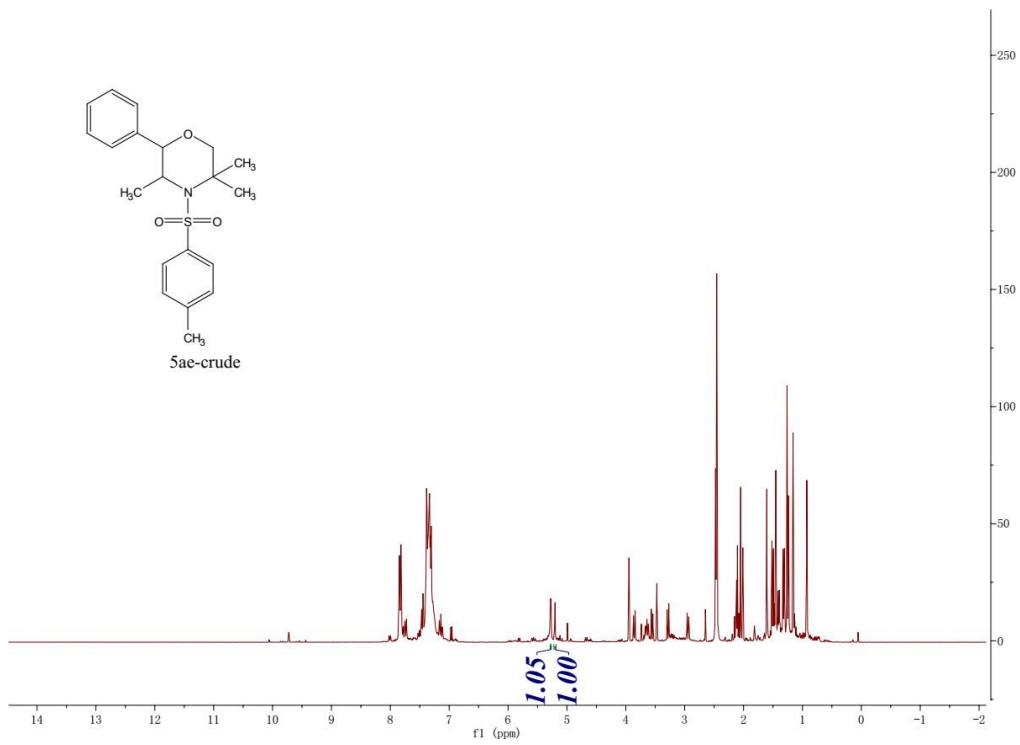

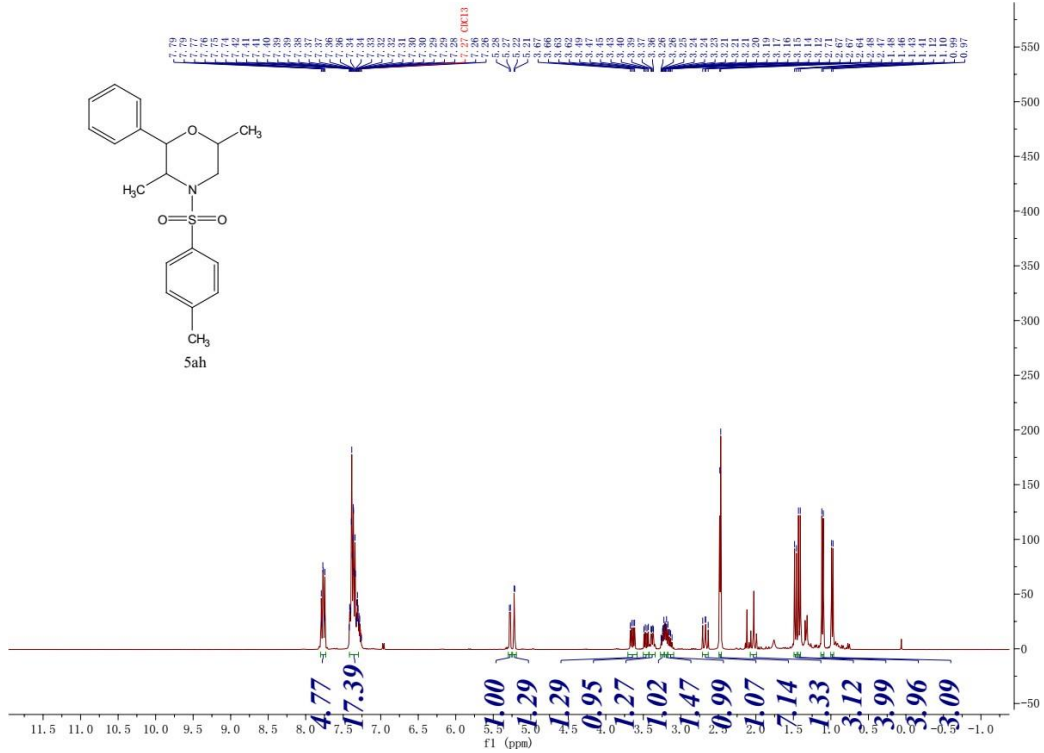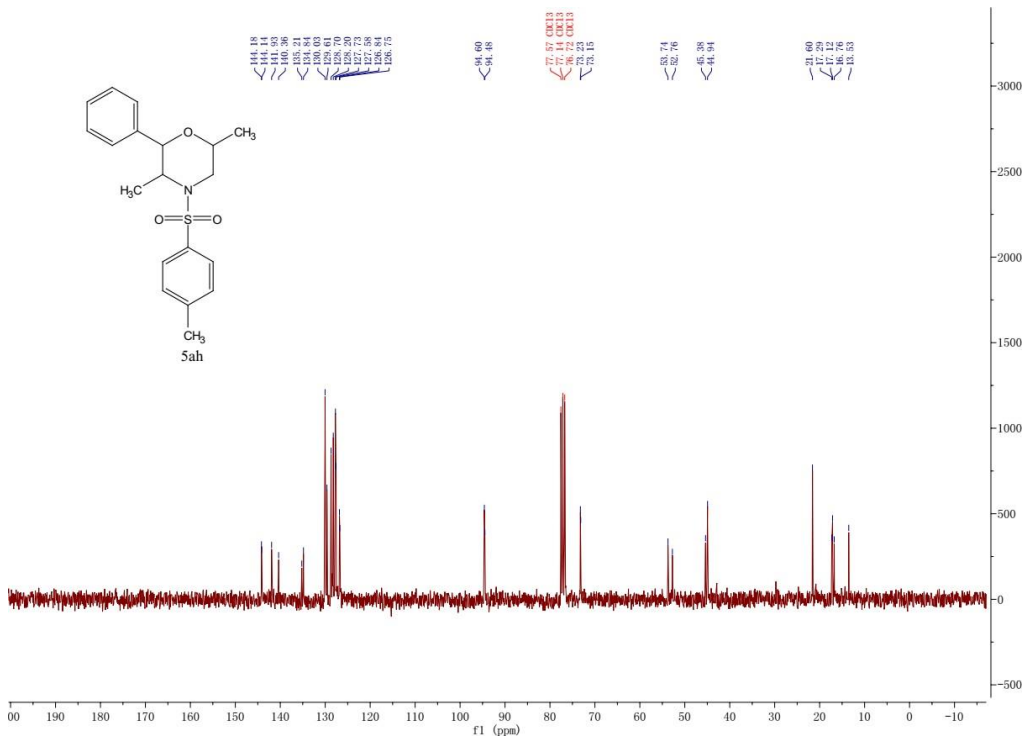

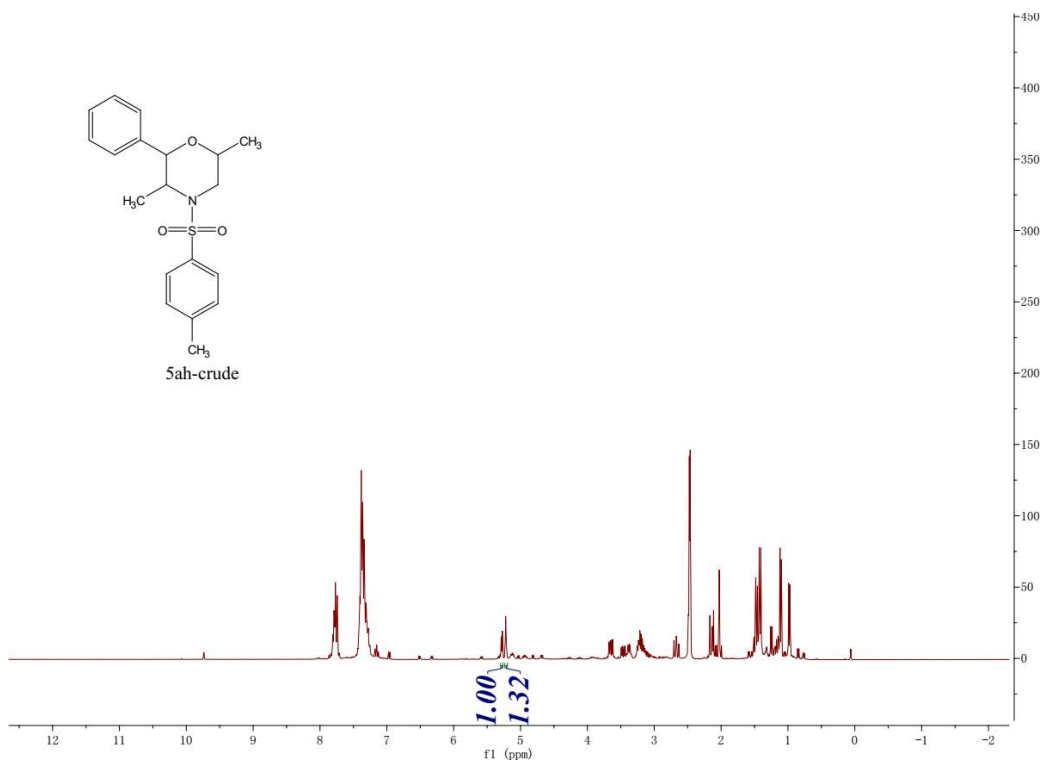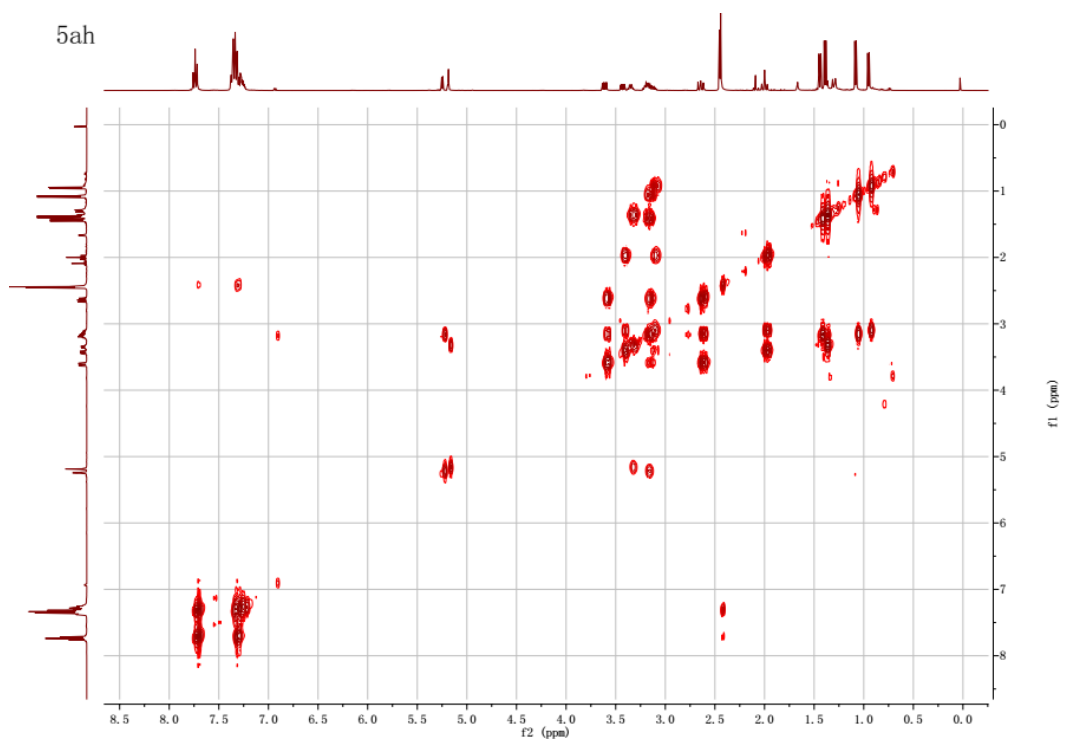

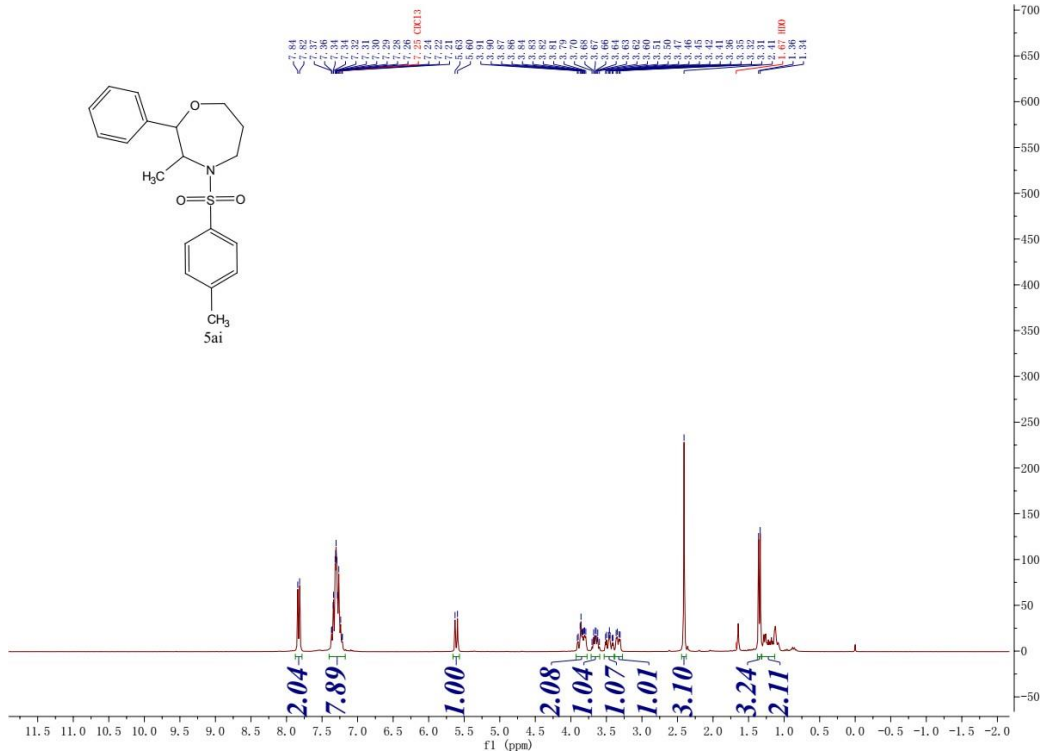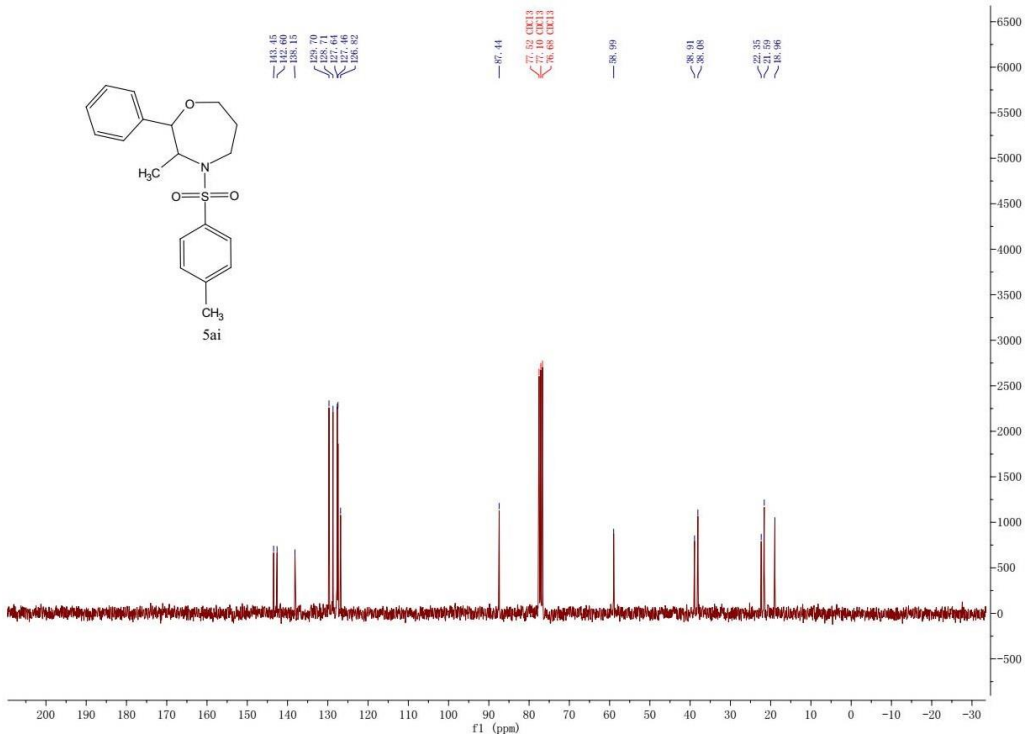

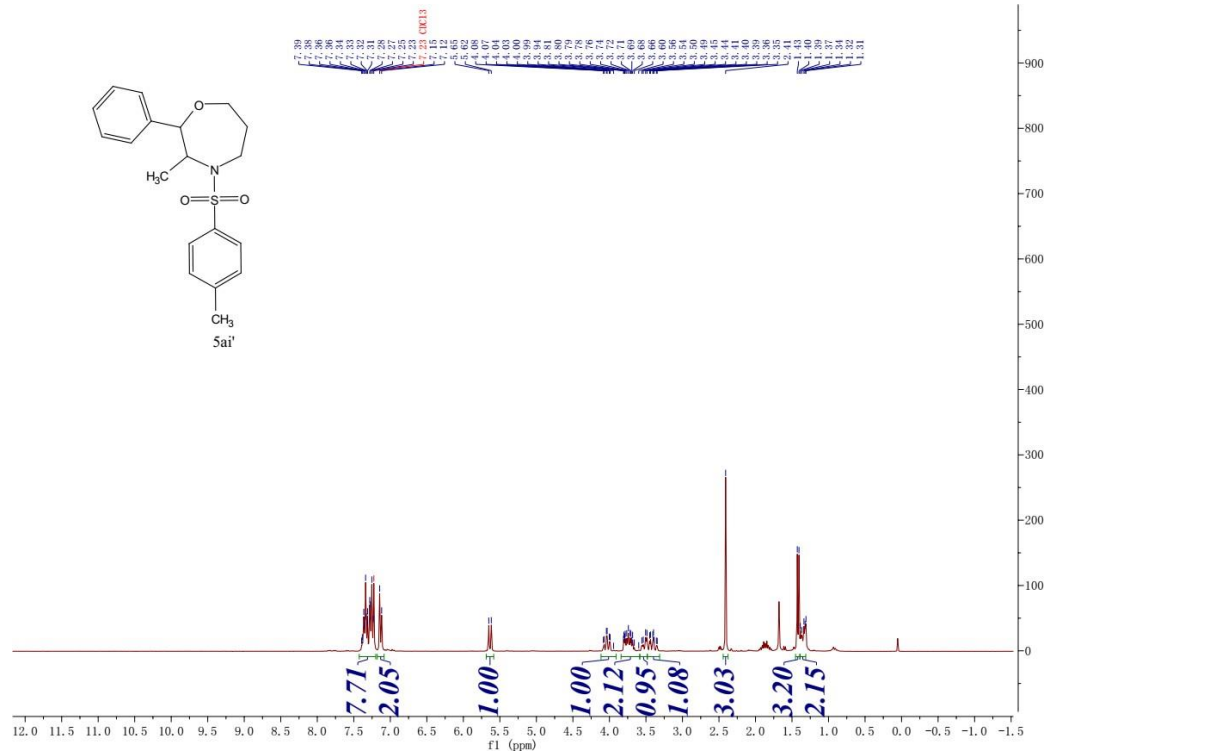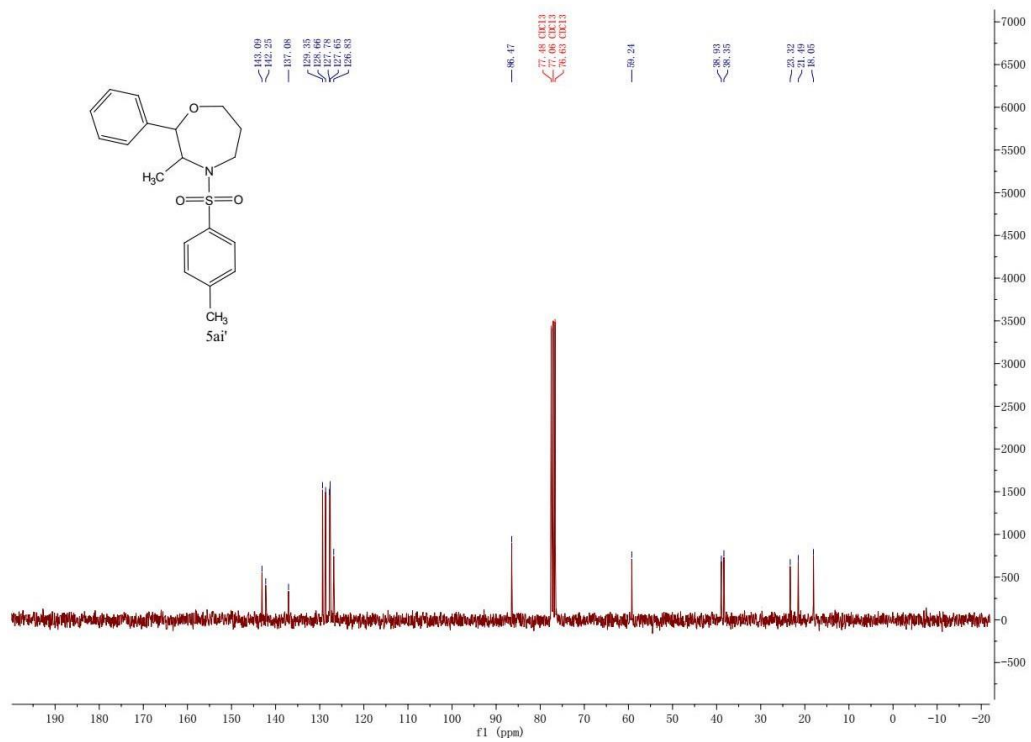



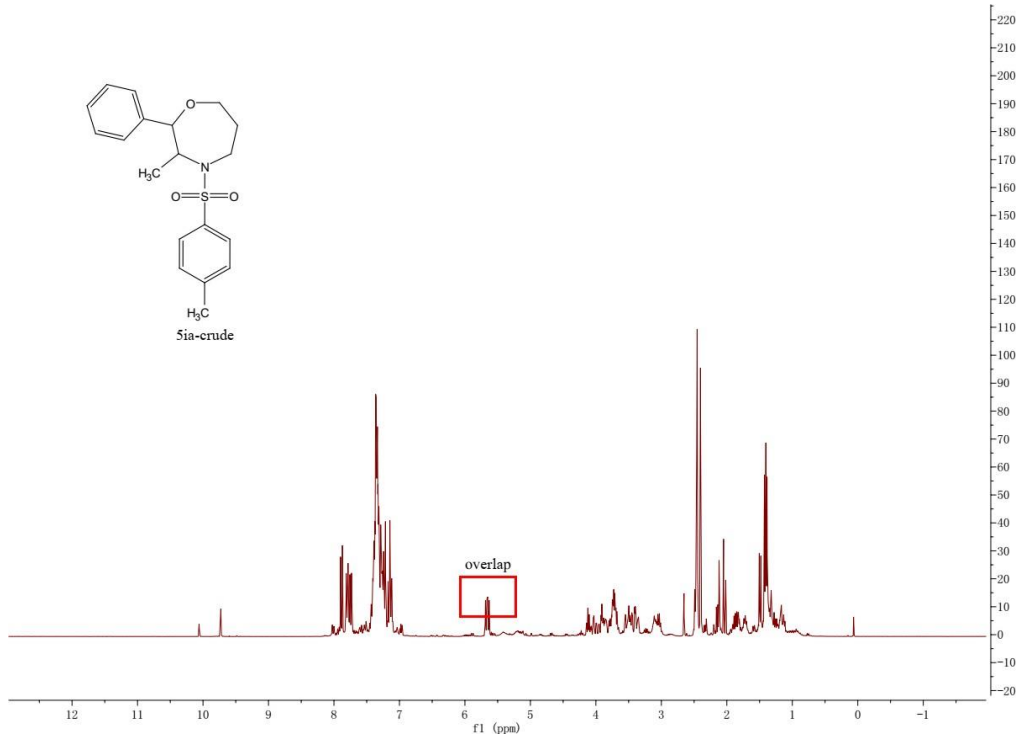

Supplement: d0ob01987a1.pdf [file d0ob01987a1.pdf]
